# Supplementary material
Source: publisher figshare collection journal article supplement (https://acs.figshare.com/ndownloader/files/5155816)
Supplement: Supplementary file 1 [file 5155816]

data_complex_1
  
_audit_creation_method            SHELXL-97 
_chemical_name_systematic 
; 
 ? 
; 
_chemical_name_common             ? 
_chemical_melting_point           ? 
_chemical_formula_moiety          ? 
_chemical_formula_sum 
 'C46 H55 Cl N2 O P2 Ru' 
_chemical_formula_weight          850.38 
  
loop_ 
 _atom_type_symbol 
 _atom_type_description 
 _atom_type_scat_dispersion_real 
 _atom_type_scat_dispersion_imag 
 _atom_type_scat_source 
 'C'  'C'   0.0033   0.0016 
 'International Tables Vol C Tables 4.2.6.8 and 6.1.1.4' 
 'H'  'H'   0.0000   0.0000 
 'International Tables Vol C Tables 4.2.6.8 and 6.1.1.4' 
 'N'  'N'   0.0061   0.0033 
 'International Tables Vol C Tables 4.2.6.8 and 6.1.1.4' 
 'P'  'P'   0.1023   0.0942 
 'International Tables Vol C Tables 4.2.6.8 and 6.1.1.4' 
 'Cl'  'Cl'   0.1484   0.1585 
 'International Tables Vol C Tables 4.2.6.8 and 6.1.1.4' 
 'Ru'  'Ru'  -1.2594   0.8363 
 'International Tables Vol C Tables 4.2.6.8 and 6.1.1.4' 
 'O'  'O'   0.0106   0.0060 
 'International Tables Vol C Tables 4.2.6.8 and 6.1.1.4' 
  
_symmetry_cell_setting            ? 
_symmetry_space_group_name_H-M    ? 
  
loop_ 
 _symmetry_equiv_pos_as_xyz 
 'x, y, z' 
 '-x, y+1/2, -z' 
  
_cell_length_a                    14.942(3) 
_cell_length_b                    9.6865(19) 
_cell_length_c                    16.344(3) 
_cell_angle_alpha                 90.00 
_cell_angle_beta                  114.46(3) 
_cell_angle_gamma                 90.00 
_cell_volume                      2153.2(7) 
_cell_formula_units_Z             2 
_cell_measurement_temperature     293(2) 
_cell_measurement_reflns_used     ? 
_cell_measurement_theta_min       ? 
_cell_measurement_theta_max       ? 
  
_exptl_crystal_description        ? 
_exptl_crystal_colour             ? 
_exptl_crystal_size_max           ? 
_exptl_crystal_size_mid           ? 
_exptl_crystal_size_min           ? 
_exptl_crystal_density_meas       ? 
_exptl_crystal_density_diffrn     1.312 
_exptl_crystal_density_method     'not measured' 
_exptl_crystal_F_000              888 
_exptl_absorpt_coefficient_mu     0.536 
_exptl_absorpt_correction_type    ? 
_exptl_absorpt_correction_T_min   ? 
_exptl_absorpt_correction_T_max   ? 
_exptl_absorpt_process_details    ? 
  
_exptl_special_details 
; 
 ? 
; 
  
_diffrn_ambient_temperature       293(2) 
_diffrn_radiation_wavelength      0.71073 
_diffrn_radiation_type            MoK\a 
_diffrn_radiation_source          'fine-focus sealed tube' 
_diffrn_radiation_monochromator   graphite 
_diffrn_measurement_device_type   ? 
_diffrn_measurement_method        ? 
_diffrn_detector_area_resol_mean  ? 
_diffrn_standards_number          ? 
_diffrn_standards_interval_count  ? 
_diffrn_standards_interval_time   ? 
_diffrn_standards_decay_%         ? 
_diffrn_reflns_number             19029 
_diffrn_reflns_av_R_equivalents   0.0584 
_diffrn_reflns_av_sigmaI/netI     0.0804 
_diffrn_reflns_limit_h_min        -19 
_diffrn_reflns_limit_h_max        19 
_diffrn_reflns_limit_k_min        -12 
_diffrn_reflns_limit_k_max        12 
_diffrn_reflns_limit_l_min        -20 
_diffrn_reflns_limit_l_max        21 
_diffrn_reflns_theta_min          2.58 
_diffrn_reflns_theta_max          27.52 
_reflns_number_total              9115 
_reflns_number_gt                 7327 
_reflns_threshold_expression      >2sigma(I) 
  
_computing_data_collection        ? 
_computing_cell_refinement        ? 
_computing_data_reduction         ? 
_computing_structure_solution     'SHELXS-97 (Sheldrick, 1990)' 
_computing_structure_refinement   'SHELXL-97 (Sheldrick, 1997)' 
_computing_molecular_graphics     ? 
_computing_publication_material   ? 
  
_refine_special_details 
; 
 Refinement of F^2^ against ALL reflections.  The weighted R-factor wR and 
 goodness of fit S are based on F^2^, conventional R-factors R are based 
 on F, with F set to zero for negative F^2^. The threshold expression of 
 F^2^ > 2sigma(F^2^) is used only for calculating R-factors(gt) etc. and is 
 not relevant to the choice of reflections for refinement.  R-factors based 
 on F^2^ are statistically about twice as large as those based on F, and R- 
 factors based on ALL data will be even larger. 
; 
  
_refine_ls_structure_factor_coef  Fsqd   
_refine_ls_matrix_type            full 
_refine_ls_weighting_scheme       calc   
_refine_ls_weighting_details 
 'calc w=1/[\s^2^(Fo^2^)+(0.0432P)^2^+1.2039P] where P=(Fo^2^+2Fc^2^)/3' 
_atom_sites_solution_primary      direct 
_atom_sites_solution_secondary    difmap 
_atom_sites_solution_hydrogens    geom 
_refine_ls_hydrogen_treatment     mixed 
_refine_ls_extinction_method      none 
_refine_ls_extinction_coef        ? 
_refine_ls_abs_structure_details 
 'Flack H D (1983), Acta Cryst. A39, 876-881' 
_refine_ls_abs_structure_Flack    -0.03(3) 
_refine_ls_number_reflns          9115 
_refine_ls_number_parameters      465 
_refine_ls_number_restraints      1 
_refine_ls_R_factor_all           0.0732 
_refine_ls_R_factor_gt            0.0474 
_refine_ls_wR_factor_ref          0.1118 
_refine_ls_wR_factor_gt           0.0984 
_refine_ls_goodness_of_fit_ref    1.050 
_refine_ls_restrained_S_all       1.050 
_refine_ls_shift/su_max           0.002 
_refine_ls_shift/su_mean          0.000 
  
loop_ 
 _atom_site_label 
 _atom_site_type_symbol 
 _atom_site_fract_x 
 _atom_site_fract_y 
 _atom_site_fract_z 
 _atom_site_U_iso_or_equiv 
 _atom_site_adp_type 
 _atom_site_occupancy 
 _atom_site_symmetry_multiplicity 
 _atom_site_calc_flag 
 _atom_site_refinement_flags 
 _atom_site_disorder_assembly 
 _atom_site_disorder_group 
Ru1 Ru -1.48702(2) -0.53120(4) 0.15493(2) 0.02370(9) Uani 1 1 d . . . 
Cl1 Cl -1.50491(9) -0.37167(12) 0.02183(7) 0.0315(3) Uani 1 1 d . . . 
P1 P -1.60924(9) -0.44242(12) 0.18127(7) 0.0246(3) Uani 1 1 d . . . 
P2 P -1.35893(9) -0.45318(13) 0.27305(8) 0.0257(3) Uani 1 1 d . . . 
N1 N -1.6053(3) -0.6311(4) 0.0438(3) 0.0273(9) Uani 1 1 d . . . 
H1A H -1.6128 -0.5877 -0.0073 0.033 Uiso 1 1 calc R . . 
H1E H -1.5871 -0.7185 0.0399 0.033 Uiso 1 1 calc R . . 
N2 N -1.3746(3) -0.6244(4) 0.1197(3) 0.0290(9) Uani 1 1 d . . . 
H2A H -1.3678 -0.7137 0.1364 0.035 Uiso 1 1 calc R . . 
H2C H -1.3954 -0.6218 0.0596 0.035 Uiso 1 1 calc R . . 
O1 O -0.9018(8) 0.1199(11) 0.2616(7) 0.066(3) Uiso 0.50 1 d P . . 
O1A O -0.9589(11) 0.1109(15) 0.2326(9) 0.104(4) Uiso 0.50 1 d P . . 
C1 C -1.7811(4) -0.6828(6) -0.0401(3) 0.0423(13) Uani 1 1 d . . . 
H1B H -1.7652 -0.7732 -0.0542 0.064 Uiso 1 1 calc R . . 
H1C H -1.7856 -0.6196 -0.0869 0.064 Uiso 1 1 calc R . . 
H1D H -1.8430 -0.6860 -0.0353 0.064 Uiso 1 1 calc R . . 
C2 C -1.7011(3) -0.6347(5) 0.0488(3) 0.0277(10) Uani 1 1 d . . . 
H2B H -1.6973 -0.7005 0.0957 0.033 Uiso 1 1 calc R . . 
C3 C -1.7207(3) -0.4910(4) 0.0768(3) 0.0277(11) Uani 1 1 d . . . 
H3A H -1.7217 -0.4278 0.0296 0.033 Uiso 1 1 calc R . . 
C4 C -1.8200(3) -0.4763(5) 0.0803(3) 0.0288(10) Uani 1 1 d . . . 
C5 C -1.8757(4) -0.3576(6) 0.0484(4) 0.0416(13) Uani 1 1 d . . . 
H5A H -1.8527 -0.2884 0.0226 0.050 Uiso 1 1 calc R . . 
C6 C -1.9645(4) -0.3404(7) 0.0543(5) 0.0613(18) Uani 1 1 d . . . 
H6A H -2.0006 -0.2599 0.0330 0.074 Uiso 1 1 calc R . . 
C7 C -2.0002(5) -0.4434(8) 0.0921(5) 0.0593(17) Uani 1 1 d . . . 
H7A H -2.0600 -0.4319 0.0963 0.071 Uiso 1 1 calc R . . 
C8 C -1.9471(4) -0.5613(6) 0.1231(4) 0.0424(15) Uani 1 1 d . . . 
H8A H -1.9710 -0.6310 0.1477 0.051 Uiso 1 1 calc R . . 
C9 C -1.8578(3) -0.5774(5) 0.1178(3) 0.0328(11) Uani 1 1 d . . . 
H9A H -1.8219 -0.6578 0.1400 0.039 Uiso 1 1 calc R . . 
C10 C -1.6402(3) -0.4957(4) 0.2742(3) 0.0294(11) Uani 1 1 d . . . 
C11 C -1.7165(4) -0.4341(5) 0.2891(3) 0.0338(11) Uani 1 1 d . . . 
H11A H -1.7520 -0.3627 0.2518 0.041 Uiso 1 1 calc R . . 
C12 C -1.7407(4) -0.4775(5) 0.3588(3) 0.0393(12) Uani 1 1 d . . . 
H12A H -1.7940 -0.4390 0.3661 0.047 Uiso 1 1 calc R . . 
C13 C -1.6837(4) -0.5798(6) 0.4173(4) 0.0451(14) Uani 1 1 d . . . 
H13A H -1.6980 -0.6079 0.4650 0.054 Uiso 1 1 calc R . . 
C14 C -1.6065(4) -0.6395(6) 0.4050(4) 0.0469(14) Uani 1 1 d . . . 
H14A H -1.5679 -0.7063 0.4449 0.056 Uiso 1 1 calc R . . 
C15 C -1.5864(4) -0.5990(5) 0.3324(3) 0.0345(11) Uani 1 1 d . . . 
H15A H -1.5360 -0.6422 0.3228 0.041 Uiso 1 1 calc R . . 
C16 C -1.6117(3) -0.2543(5) 0.1911(3) 0.0275(10) Uani 1 1 d . . . 
C17 C -1.5710(4) -0.1934(5) 0.2763(3) 0.0353(11) Uani 1 1 d . . . 
H17A H -1.5538 -0.2481 0.3273 0.042 Uiso 1 1 calc R . . 
C18 C -1.5560(4) -0.0491(6) 0.2853(3) 0.0434(13) Uani 1 1 d . . . 
H18A H -1.5291 -0.0091 0.3421 0.052 Uiso 1 1 calc R . . 
C19 C -1.5810(4) 0.0315(6) 0.2105(4) 0.0465(13) Uani 1 1 d . . . 
H19A H -1.5708 0.1264 0.2168 0.056 Uiso 1 1 calc R . . 
C20 C -1.6214(4) -0.0267(8) 0.1252(3) 0.0438(11) Uani 1 1 d . . . 
H20A H -1.6386 0.0290 0.0746 0.053 Uiso 1 1 calc R . . 
C21 C -1.6359(4) -0.1676(5) 0.1159(3) 0.0343(11) Uani 1 1 d . . . 
H21A H -1.6622 -0.2060 0.0586 0.041 Uiso 1 1 calc R . . 
C22 C -1.1993(4) -0.6395(6) 0.1440(4) 0.0436(14) Uani 1 1 d . . . 
H22A H -1.2193 -0.6487 0.0804 0.065 Uiso 1 1 calc R . . 
H22B H -1.1930 -0.7294 0.1706 0.065 Uiso 1 1 calc R . . 
H22C H -1.1371 -0.5927 0.1700 0.065 Uiso 1 1 calc R . . 
C23 C -1.2764(3) -0.5560(5) 0.1618(3) 0.0280(11) Uani 1 1 d . . . 
H23A H -1.2815 -0.4647 0.1344 0.034 Uiso 1 1 calc R . . 
C24 C -1.2501(3) -0.5364(8) 0.2613(3) 0.0303(9) Uani 1 1 d . . . 
H24A H -1.2456 -0.6297 0.2859 0.036 Uiso 1 1 calc R . . 
C25 C -1.1530(4) -0.4704(6) 0.3155(3) 0.0416(13) Uani 1 1 d . . . 
C26 C -1.1002(4) -0.5080(8) 0.4049(4) 0.060(2) Uani 1 1 d . . . 
H26A H -1.1237 -0.5789 0.4291 0.072 Uiso 1 1 calc R . . 
C27 C -1.0140(5) -0.4426(12) 0.4584(5) 0.094(3) Uani 1 1 d . . . 
H27A H -0.9819 -0.4669 0.5187 0.113 Uiso 1 1 calc R . . 
C28 C -0.9760(5) -0.3450(10) 0.4249(6) 0.083(3) Uani 1 1 d . . . 
H28A H -0.9159 -0.3052 0.4612 0.100 Uiso 1 1 calc R . . 
C29 C -1.0250(5) -0.3024(9) 0.3364(6) 0.079(3) Uani 1 1 d . . . 
H29A H -0.9994 -0.2324 0.3136 0.095 Uiso 1 1 calc R . . 
C30 C -1.1147(4) -0.3671(7) 0.2815(4) 0.0517(15) Uani 1 1 d . . . 
H30A H -1.1482 -0.3397 0.2220 0.062 Uiso 1 1 calc R . . 
C31 C -1.3228(3) -0.2711(5) 0.2907(3) 0.0307(10) Uani 1 1 d . . . 
C32 C -1.2509(4) -0.2171(6) 0.3692(3) 0.0397(12) Uani 1 1 d . . . 
H32A H -1.2194 -0.2748 0.4183 0.048 Uiso 1 1 calc R . . 
C33 C -1.2253(4) -0.0788(6) 0.3756(4) 0.0518(16) Uani 1 1 d . . . 
H33A H -1.1784 -0.0436 0.4292 0.062 Uiso 1 1 calc R . . 
C34 C -1.2698(5) 0.0066(6) 0.3021(4) 0.0553(17) Uani 1 1 d . . . 
H34A H -1.2512 0.0988 0.3055 0.066 Uiso 1 1 calc R . . 
C35 C -1.3420(4) -0.0444(8) 0.2233(4) 0.0441(12) Uani 1 1 d . . . 
H35A H -1.3723 0.0133 0.1739 0.053 Uiso 1 1 calc R . . 
C36 C -1.3689(4) -0.1815(5) 0.2185(3) 0.0333(11) Uani 1 1 d . . . 
H36A H -1.4187 -0.2148 0.1660 0.040 Uiso 1 1 calc R . . 
C37 C -1.3423(3) -0.5154(7) 0.3853(3) 0.0329(11) Uani 1 1 d . . . 
C38 C -1.3330(4) -0.6564(6) 0.4007(3) 0.0400(13) Uani 1 1 d . . . 
H38A H -1.3313 -0.7146 0.3561 0.048 Uiso 1 1 calc R . . 
C39 C -1.3261(4) -0.7123(7) 0.4809(4) 0.0497(15) Uani 1 1 d . . . 
H39A H -1.3195 -0.8072 0.4900 0.060 Uiso 1 1 calc R . . 
C40 C -1.3291(5) -0.6269(7) 0.5477(4) 0.0592(19) Uani 1 1 d . . . 
H40A H -1.3221 -0.6635 0.6026 0.071 Uiso 1 1 calc R . . 
C41 C -1.3425(5) -0.4882(7) 0.5319(4) 0.059(2) Uani 1 1 d . . . 
H41A H -1.3469 -0.4309 0.5757 0.071 Uiso 1 1 calc R . . 
C42 C -1.3496(4) -0.4314(6) 0.4510(3) 0.0434(13) Uani 1 1 d . . . 
H42A H -1.3592 -0.3370 0.4411 0.052 Uiso 1 1 calc R . . 
C43 C -0.9482(7) 0.2496(10) 0.3574(6) 0.090(2) Uiso 1 1 d . . . 
C44 C -0.8959(16) 0.137(2) 0.3342(14) 0.095(6) Uiso 0.50 1 d P . . 
C44A C -0.9493(17) 0.114(2) 0.3201(15) 0.100(6) Uiso 0.50 1 d P . . 
C46 C -0.9115(10) -0.011(2) 0.2143(9) 0.165(5) Uiso 1 1 d . . . 
C47 C -0.8442(8) 0.0071(14) 0.1724(7) 0.141(4) Uiso 1 1 d . . . 
H47A H -0.8205 -0.0813 0.1636 0.212 Uiso 1 1 calc R . . 
H47B H -0.7897 0.0629 0.2104 0.212 Uiso 1 1 calc R . . 
H47C H -0.8775 0.0520 0.1154 0.212 Uiso 1 1 calc R . . 
H1RU H -1.477(3) -0.667(4) 0.221(3) 0.014(10) Uiso 1 1 d . . . 
  
loop_ 
 _atom_site_aniso_label 
 _atom_site_aniso_U_11 
 _atom_site_aniso_U_22 
 _atom_site_aniso_U_33 
 _atom_site_aniso_U_23 
 _atom_site_aniso_U_13 
 _atom_site_aniso_U_12 
Ru1 0.02656(16) 0.01987(16) 0.02848(15) -0.00059(18) 0.01519(13) -0.00035(18) 
Cl1 0.0378(6) 0.0296(6) 0.0302(5) 0.0036(5) 0.0172(5) -0.0023(5) 
P1 0.0288(6) 0.0199(6) 0.0302(6) -0.0003(5) 0.0173(5) -0.0003(5) 
P2 0.0301(6) 0.0233(6) 0.0262(5) 0.0013(5) 0.0141(5) 0.0018(5) 
N1 0.027(2) 0.025(2) 0.035(2) -0.0045(16) 0.0181(18) -0.0008(16) 
N2 0.026(2) 0.028(2) 0.034(2) -0.0075(17) 0.0124(18) -0.0008(16) 
C1 0.031(3) 0.050(3) 0.051(3) -0.023(3) 0.022(2) -0.011(2) 
C2 0.022(2) 0.022(2) 0.041(3) -0.006(2) 0.015(2) -0.0028(19) 
C3 0.028(2) 0.027(3) 0.031(2) 0.0017(18) 0.014(2) 0.0027(17) 
C4 0.030(2) 0.030(3) 0.028(2) -0.0028(18) 0.013(2) 0.0023(19) 
C5 0.033(3) 0.037(3) 0.061(3) 0.015(3) 0.027(3) 0.009(2) 
C6 0.044(3) 0.056(4) 0.098(5) 0.030(4) 0.044(4) 0.023(3) 
C7 0.043(3) 0.064(4) 0.087(4) 0.017(4) 0.044(3) 0.012(3) 
C8 0.039(3) 0.045(4) 0.054(3) 0.003(3) 0.031(3) -0.001(2) 
C9 0.030(2) 0.029(3) 0.042(3) -0.0036(19) 0.017(2) 0.0023(19) 
C10 0.034(2) 0.028(3) 0.031(2) -0.0038(18) 0.018(2) -0.0052(18) 
C11 0.041(3) 0.030(3) 0.037(2) -0.004(2) 0.024(2) -0.003(2) 
C12 0.047(3) 0.037(3) 0.046(3) -0.011(2) 0.031(3) -0.011(2) 
C13 0.058(4) 0.048(4) 0.043(3) 0.002(2) 0.035(3) -0.010(3) 
C14 0.063(4) 0.041(3) 0.048(3) 0.011(3) 0.034(3) 0.002(3) 
C15 0.043(3) 0.028(3) 0.043(3) 0.000(2) 0.028(3) -0.004(2) 
C16 0.028(2) 0.024(2) 0.037(2) 0.000(2) 0.021(2) 0.0009(19) 
C17 0.039(3) 0.028(3) 0.044(3) 0.000(2) 0.022(2) 0.000(2) 
C18 0.054(3) 0.032(3) 0.053(3) -0.015(3) 0.030(3) -0.010(3) 
C19 0.057(3) 0.020(3) 0.071(4) 0.000(3) 0.036(3) 0.001(2) 
C20 0.058(3) 0.026(2) 0.056(3) 0.009(4) 0.032(2) 0.004(4) 
C21 0.043(3) 0.021(3) 0.039(3) 0.002(2) 0.016(2) 0.003(2) 
C22 0.029(3) 0.058(4) 0.046(3) -0.015(3) 0.018(2) 0.002(2) 
C23 0.0198(19) 0.034(3) 0.030(2) -0.003(2) 0.0097(17) -0.0003(19) 
C24 0.029(2) 0.032(2) 0.0293(19) 0.001(3) 0.0110(17) 0.005(3) 
C25 0.026(2) 0.058(4) 0.037(3) -0.010(2) 0.010(2) 0.008(2) 
C26 0.045(3) 0.079(6) 0.043(3) -0.015(3) 0.005(2) 0.025(4) 
C27 0.036(4) 0.163(9) 0.062(4) -0.035(5) -0.001(3) 0.026(5) 
C28 0.034(4) 0.127(8) 0.076(5) -0.055(5) 0.011(4) -0.012(4) 
C29 0.046(4) 0.094(6) 0.110(7) -0.046(5) 0.044(5) -0.018(4) 
C30 0.035(3) 0.060(4) 0.062(4) -0.020(3) 0.023(3) -0.013(3) 
C31 0.029(2) 0.028(3) 0.037(2) -0.005(2) 0.015(2) -0.002(2) 
C32 0.035(3) 0.039(3) 0.038(3) -0.007(2) 0.008(2) -0.003(2) 
C33 0.049(3) 0.047(4) 0.057(4) -0.020(3) 0.019(3) -0.016(3) 
C34 0.062(4) 0.035(4) 0.081(4) -0.016(3) 0.042(4) -0.017(3) 
C35 0.053(3) 0.029(3) 0.056(3) 0.000(3) 0.029(3) -0.002(3) 
C36 0.034(3) 0.029(3) 0.039(3) 0.002(2) 0.017(2) 0.000(2) 
C37 0.033(2) 0.038(3) 0.0295(19) 0.004(2) 0.0144(18) 0.006(3) 
C38 0.051(3) 0.039(3) 0.035(3) 0.007(2) 0.023(3) 0.008(3) 
C39 0.070(4) 0.039(3) 0.049(3) 0.014(3) 0.034(3) 0.012(3) 
C40 0.085(5) 0.064(5) 0.040(3) 0.024(3) 0.037(4) 0.018(4) 
C41 0.093(5) 0.062(5) 0.034(3) 0.007(3) 0.036(3) 0.022(4) 
C42 0.061(4) 0.038(3) 0.034(3) 0.004(2) 0.022(3) 0.009(3) 
  
_geom_special_details 
; 
 All esds (except the esd in the dihedral angle between two l.s. planes) 
 are estimated using the full covariance matrix.  The cell esds are taken 
 into account individually in the estimation of esds in distances, angles 
 and torsion angles; correlations between esds in cell parameters are only 
 used when they are defined by crystal symmetry.  An approximate (isotropic) 
 treatment of cell esds is used for estimating esds involving l.s. planes. 
; 
  
loop_ 
 _geom_bond_atom_site_label_1 
 _geom_bond_atom_site_label_2 
 _geom_bond_distance 
 _geom_bond_site_symmetry_2 
 _geom_bond_publ_flag 
Ru1 N1 2.168(4) . ? 
Ru1 N2 2.184(4) . ? 
Ru1 P2 2.2138(15) . ? 
Ru1 P1 2.2160(12) . ? 
Ru1 Cl1 2.5904(12) . ? 
P1 C16 1.831(5) . ? 
P1 C10 1.836(4) . ? 
P1 C3 1.886(5) . ? 
P2 C31 1.832(5) . ? 
P2 C37 1.848(5) . ? 
P2 C24 1.895(5) . ? 
N1 C2 1.468(5) . ? 
N2 C23 1.493(5) . ? 
O1 O1A 0.790(14) . ? 
O1 C44 1.17(2) . ? 
O1 C44A 1.41(2) . ? 
O1 C46 1.46(2) . ? 
O1A C44A 1.38(2) . ? 
O1A C46 1.47(2) . ? 
O1A C44 1.55(3) . ? 
C1 C2 1.523(7) . ? 
C2 C3 1.530(6) . ? 
C3 C4 1.514(6) . ? 
C4 C5 1.389(7) . ? 
C4 C9 1.393(6) . ? 
C5 C6 1.381(7) . ? 
C6 C7 1.391(9) . ? 
C7 C8 1.363(8) . ? 
C8 C9 1.381(7) . ? 
C10 C15 1.385(7) . ? 
C10 C11 1.395(7) . ? 
C11 C12 1.395(7) . ? 
C12 C13 1.395(7) . ? 
C13 C14 1.378(8) . ? 
C14 C15 1.396(7) . ? 
C16 C17 1.398(7) . ? 
C16 C21 1.407(6) . ? 
C17 C18 1.414(8) . ? 
C18 C19 1.366(8) . ? 
C19 C20 1.390(8) . ? 
C20 C21 1.380(9) . ? 
C22 C23 1.531(6) . ? 
C23 C24 1.519(5) . ? 
C24 C25 1.494(7) . ? 
C25 C30 1.378(9) . ? 
C25 C26 1.392(7) . ? 
C26 C27 1.375(10) . ? 
C27 C28 1.332(13) . ? 
C28 C29 1.386(11) . ? 
C29 C30 1.414(9) . ? 
C31 C32 1.391(7) . ? 
C31 C36 1.396(7) . ? 
C32 C33 1.385(8) . ? 
C33 C34 1.382(8) . ? 
C34 C35 1.384(8) . ? 
C35 C36 1.380(9) . ? 
C37 C38 1.385(8) . ? 
C37 C42 1.386(7) . ? 
C38 C39 1.382(7) . ? 
C39 C40 1.385(9) . ? 
C40 C41 1.367(9) . ? 
C41 C42 1.395(7) . ? 
C43 C44A 1.44(2) . ? 
C43 C44 1.48(2) . ? 
C44 C44A 0.77(3) . ? 
C46 C47 1.442(15) . ? 
  
loop_ 
 _geom_angle_atom_site_label_1 
 _geom_angle_atom_site_label_2 
 _geom_angle_atom_site_label_3 
 _geom_angle 
 _geom_angle_site_symmetry_1 
 _geom_angle_site_symmetry_3 
 _geom_angle_publ_flag 
N1 Ru1 N2 92.52(14) . . ? 
N1 Ru1 P2 173.40(12) . . ? 
N2 Ru1 P2 83.65(11) . . ? 
N1 Ru1 P1 83.36(10) . . ? 
N2 Ru1 P1 175.82(11) . . ? 
P2 Ru1 P1 100.52(5) . . ? 
N1 Ru1 Cl1 78.35(11) . . ? 
N2 Ru1 Cl1 81.28(11) . . ? 
P2 Ru1 Cl1 106.26(5) . . ? 
P1 Ru1 Cl1 97.17(5) . . ? 
C16 P1 C10 100.7(2) . . ? 
C16 P1 C3 106.6(2) . . ? 
C10 P1 C3 104.4(2) . . ? 
C16 P1 Ru1 116.85(14) . . ? 
C10 P1 Ru1 124.19(16) . . ? 
C3 P1 Ru1 102.54(14) . . ? 
C31 P2 C37 104.4(3) . . ? 
C31 P2 C24 102.5(3) . . ? 
C37 P2 C24 101.1(2) . . ? 
C31 P2 Ru1 123.91(16) . . ? 
C37 P2 Ru1 117.84(18) . . ? 
C24 P2 Ru1 103.59(15) . . ? 
C2 N1 Ru1 116.1(3) . . ? 
C23 N2 Ru1 114.3(3) . . ? 
O1A O1 C44 103.6(19) . . ? 
O1A O1 C44A 71.4(15) . . ? 
C44 O1 C44A 33.0(12) . . ? 
O1A O1 C46 75.0(15) . . ? 
C44 O1 C46 127.9(15) . . ? 
C44A O1 C46 111.0(13) . . ? 
O1 O1A C44A 75.7(16) . . ? 
O1 O1A C46 73.7(15) . . ? 
C44A O1A C46 112.3(15) . . ? 
O1 O1A C44 46.8(13) . . ? 
C44A O1A C44 29.5(11) . . ? 
C46 O1A C44 102.8(14) . . ? 
N1 C2 C1 110.6(4) . . ? 
N1 C2 C3 107.9(4) . . ? 
C1 C2 C3 113.1(4) . . ? 
C4 C3 C2 114.1(4) . . ? 
C4 C3 P1 117.0(3) . . ? 
C2 C3 P1 106.9(3) . . ? 
C5 C4 C9 117.2(4) . . ? 
C5 C4 C3 120.5(4) . . ? 
C9 C4 C3 122.2(4) . . ? 
C6 C5 C4 121.2(5) . . ? 
C5 C6 C7 120.1(6) . . ? 
C8 C7 C6 119.6(5) . . ? 
C7 C8 C9 120.1(5) . . ? 
C8 C9 C4 121.8(5) . . ? 
C15 C10 C11 118.2(4) . . ? 
C15 C10 P1 119.9(4) . . ? 
C11 C10 P1 121.9(4) . . ? 
C12 C11 C10 121.4(5) . . ? 
C11 C12 C13 118.9(5) . . ? 
C14 C13 C12 120.5(5) . . ? 
C13 C14 C15 119.6(5) . . ? 
C10 C15 C14 121.3(5) . . ? 
C17 C16 C21 117.8(4) . . ? 
C17 C16 P1 119.4(4) . . ? 
C21 C16 P1 121.6(3) . . ? 
C16 C17 C18 120.4(5) . . ? 
C19 C18 C17 120.0(5) . . ? 
C18 C19 C20 120.7(5) . . ? 
C21 C20 C19 119.7(5) . . ? 
C20 C21 C16 121.5(5) . . ? 
N2 C23 C24 108.5(4) . . ? 
N2 C23 C22 110.6(4) . . ? 
C24 C23 C22 112.8(4) . . ? 
C25 C24 C23 116.4(4) . . ? 
C25 C24 P2 114.9(4) . . ? 
C23 C24 P2 108.0(3) . . ? 
C30 C25 C26 117.6(6) . . ? 
C30 C25 C24 122.4(5) . . ? 
C26 C25 C24 119.9(6) . . ? 
C27 C26 C25 121.4(8) . . ? 
C28 C27 C26 120.8(8) . . ? 
C27 C28 C29 120.6(7) . . ? 
C28 C29 C30 118.9(8) . . ? 
C25 C30 C29 120.6(6) . . ? 
C32 C31 C36 117.9(5) . . ? 
C32 C31 P2 124.9(4) . . ? 
C36 C31 P2 117.1(4) . . ? 
C33 C32 C31 121.2(5) . . ? 
C34 C33 C32 119.6(5) . . ? 
C33 C34 C35 120.3(5) . . ? 
C36 C35 C34 119.5(6) . . ? 
C35 C36 C31 121.4(5) . . ? 
C38 C37 C42 118.2(5) . . ? 
C38 C37 P2 117.6(4) . . ? 
C42 C37 P2 123.8(5) . . ? 
C39 C38 C37 121.4(5) . . ? 
C38 C39 C40 120.0(6) . . ? 
C41 C40 C39 119.2(5) . . ? 
C40 C41 C42 120.9(6) . . ? 
C37 C42 C41 120.2(5) . . ? 
C44A C43 C44 30.4(10) . . ? 
C44A C44 O1 91(3) . . ? 
C44A C44 C43 72(3) . . ? 
O1 C44 C43 123.0(18) . . ? 
C44A C44 O1A 62(2) . . ? 
O1 C44 O1A 29.6(9) . . ? 
C43 C44 O1A 104.3(15) . . ? 
C44 C44A O1A 88(3) . . ? 
C44 C44A O1 56(2) . . ? 
O1A C44A O1 32.9(8) . . ? 
C44 C44A C43 77(3) . . ? 
O1A C44A C43 116.1(17) . . ? 
O1 C44A C43 109.4(16) . . ? 
C47 C46 O1 102.0(13) . . ? 
C47 C46 O1A 119.1(15) . . ? 
O1 C46 O1A 31.3(7) . . ? 
  
_diffrn_measured_fraction_theta_max    0.989 
_diffrn_reflns_theta_full              27.52 
_diffrn_measured_fraction_theta_full   0.989 
_refine_diff_density_max    1.047 
_refine_diff_density_min   -0.733 
_refine_diff_density_rms    0.089 

#===End

data_complex_3 
   
_audit_creation_method            SHELXL-97 
_chemical_name_systematic 
; 
 ? 
; 
_chemical_name_common             ? 
_chemical_melting_point           ? 
_chemical_formula_moiety          ? 
_chemical_formula_sum 
 'C73.50 H67 Cl N P3 Ru' 
_chemical_formula_weight          1193.71 
_chemical_absolute_configuration  'rmad' 
   
loop_ 
 _atom_type_symbol 
 _atom_type_description 
 _atom_type_scat_dispersion_real 
 _atom_type_scat_dispersion_imag 
 _atom_type_scat_source 
 'C'  'C'   0.0033   0.0016 
 'International Tables Vol C Tables 4.2.6.8 and 6.1.1.4' 
 'H'  'H'   0.0000   0.0000 
 'International Tables Vol C Tables 4.2.6.8 and 6.1.1.4' 
 'Cl'  'Cl'   0.1484   0.1585 
 'International Tables Vol C Tables 4.2.6.8 and 6.1.1.4' 
 'N'  'N'   0.0061   0.0033 
 'International Tables Vol C Tables 4.2.6.8 and 6.1.1.4' 
 'P'  'P'   0.1023   0.0942 
 'International Tables Vol C Tables 4.2.6.8 and 6.1.1.4' 
 'Ru'  'Ru'  -1.2594   0.8363 
 'International Tables Vol C Tables 4.2.6.8 and 6.1.1.4' 
   
_symmetry_cell_setting            Orthorhombic 
_symmetry_space_group_name_H-M    'P 21 21 21' 
   
loop_ 
 _symmetry_equiv_pos_as_xyz 
 'x, y, z' 
 '-x+1/2, -y, z+1/2' 
 'x+1/2, -y+1/2, -z' 
 '-x, y+1/2, -z+1/2' 
   
_cell_length_a                    15.1090(2) 
_cell_length_b                    18.86700(10) 
_cell_length_c                    21.7860(2) 
_cell_angle_alpha                 90.00 
_cell_angle_beta                  90.00 
_cell_angle_gamma                 90.00 
_cell_volume                      6210.35(11) 
_cell_formula_units_Z             4 
_cell_measurement_temperature     150(1) 
_cell_measurement_reflns_used     57648 
_cell_measurement_theta_min       2.6 
_cell_measurement_theta_max       27.5 
   
_exptl_crystal_description        'plate' 
_exptl_crystal_colour             ? 
_exptl_crystal_size_max           0.24 
_exptl_crystal_size_mid           0.24 
_exptl_crystal_size_min           0.08 
_exptl_crystal_density_meas       ? 
_exptl_crystal_density_diffrn     1.277 
_exptl_crystal_density_method     'not measured' 
_exptl_crystal_F_000              2484 
_exptl_absorpt_coefficient_mu     0.416 
# Absorption correction 
   
_exptl_absorpt_correction_type 'multi-scan' 
_exptl_absorpt_correction_T_min  0.913 
_exptl_absorpt_correction_T_max  0.970 
_exptl_absorpt_process_details 
; 
multi-scan from symmetry-related measurements 
 Sortav (Blessing 1995) 
; 
   
_exptl_special_details 
; 
 ? 
; 
   
_diffrn_ambient_temperature       150(1) 
_diffrn_radiation_wavelength      0.71073 
_diffrn_radiation_type            MoK\a 
_diffrn_radiation_source          'fine-focus sealed tube' 
_diffrn_radiation_monochromator   graphite 
_diffrn_measurement_device_type   'Nonius KappaCCD' 
_diffrn_measurement_method        '\f scans and \w scans with \k offsets' 
_diffrn_detector_area_resol_mean  9 
_diffrn_standards_number          0 
_diffrn_standards_interval_count  0 
_diffrn_standards_interval_time   0 
_diffrn_standards_decay_%         0 
_diffrn_reflns_number             54076 
_diffrn_reflns_av_R_equivalents   0.0382 
_diffrn_reflns_av_sigmaI/netI     0.0406 
_diffrn_reflns_limit_h_min        -15 
_diffrn_reflns_limit_h_max        19 
_diffrn_reflns_limit_k_min        -24 
_diffrn_reflns_limit_k_max        24 
_diffrn_reflns_limit_l_min        -28 
_diffrn_reflns_limit_l_max        28 
_diffrn_reflns_theta_min          2.70 
_diffrn_reflns_theta_max          27.47 
_reflns_number_total              14022 
_reflns_number_gt                 12597 
_reflns_threshold_expression      'I>2\s(I)' 
   
_computing_data_collection        'Collect (Nonius BV, 1997-2003)' 
_computing_cell_refinement        'Denzo-SMN (Otwinowski & Minor, 1997)' 
_computing_data_reduction         'Denzo-SMN' 
_computing_structure_solution     'SIR-92 (Altomare et al., 1993)' 
_computing_structure_refinement   'SHELXTL V6.12(Sheldrick, 2001)' 
_computing_molecular_graphics     'SHELXTL V6.12' 
_computing_publication_material   'SHELXTL V6.12' 

   
_refine_special_details 
; 
 Refinement of F^2^ against ALL reflections.  The weighted R-factor wR and 
 goodness of fit S are based on F^2^, conventional R-factors R are based 
 on F, with F set to zero for negative F^2^. The threshold expression of 
 F^2^ > 2sigma(F^2^) is used only for calculating R-factors(gt) etc. and is 
 not relevant to the choice of reflections for refinement.  R-factors based 
 on F^2^ are statistically about twice as large as those based on F, and R- 
 factors based on ALL data will be even larger. 
; 
   
_refine_ls_structure_factor_coef  Fsqd 
_refine_ls_matrix_type            full 
_refine_ls_weighting_scheme       calc 
_refine_ls_weighting_details 
 'calc w=1/[\s^2^(Fo^2^)+(0.0647P)^2^+2.6007P] where P=(Fo^2^+2Fc^2^)/3' 
_atom_sites_solution_primary      direct 
_atom_sites_solution_secondary    difmap 
_atom_sites_solution_hydrogens    geom 
_refine_ls_hydrogen_treatment     mixed 
_refine_ls_extinction_method      SHELXL 
_refine_ls_extinction_coef        0.0008(2) 
_refine_ls_extinction_expression 
 'Fc^*^=kFc[1+0.001xFc^2^\l^3^/sin(2\q)]^-1/4^' 
_refine_ls_abs_structure_details 
 'Flack H D (1983), Acta Cryst. A39, 876-881' 
_refine_ls_abs_structure_Flack    -0.03(2) 
_refine_ls_number_reflns          14022 
_refine_ls_number_parameters      720 
_refine_ls_number_restraints      7 
_refine_ls_R_factor_all           0.0464 
_refine_ls_R_factor_gt            0.0380 
_refine_ls_wR_factor_ref          0.1134 
_refine_ls_wR_factor_gt           0.1075 
_refine_ls_goodness_of_fit_ref    1.116 
_refine_ls_restrained_S_all       1.117 
_refine_ls_shift/su_max           0.010 
_refine_ls_shift/su_mean          0.000 
   
loop_ 
 _atom_site_label 
 _atom_site_type_symbol 
 _atom_site_fract_x 
 _atom_site_fract_y 
 _atom_site_fract_z 
 _atom_site_U_iso_or_equiv 
 _atom_site_adp_type 
 _atom_site_occupancy 
 _atom_site_symmetry_multiplicity 
 _atom_site_calc_flag 
 _atom_site_refinement_flags 
 _atom_site_disorder_assembly 
 _atom_site_disorder_group 
Ru1 Ru 0.799528(16) 0.011301(12) 0.037507(11) 0.01850(7) Uani 1 1 d . . . 
H1RU H 0.844(2) -0.0009(18) -0.0247(16) 0.026(9) Uiso 1 1 d . . . 
Cl1 Cl 0.72563(5) 0.04870(4) 0.13830(4) 0.02650(18) Uani 1 1 d . . . 
P1 P 0.93858(5) -0.02039(4) 0.07263(4) 0.02000(17) Uani 1 1 d . . . 
P2 P 0.74107(5) -0.09931(4) 0.02898(4) 0.01916(16) Uani 1 1 d . . . 
P3 P 0.69941(5) 0.05410(4) -0.03381(4) 0.01837(15) Uani 1 1 d . . . 
N1 N 0.85416(19) 0.11745(14) 0.05044(13) 0.0250(6) Uani 1 1 d . . . 
H1B H 0.8696 0.1351 0.0126 0.030 Uiso 1 1 calc R . . 
H1C H 0.8101 0.1461 0.0658 0.030 Uiso 1 1 calc R . . 
C1 C 1.0003(2) 0.06768(17) 0.07209(15) 0.0228(7) Uani 1 1 d . . . 
H1A H 1.0170 0.0779 0.0286 0.027 Uiso 1 1 calc R . . 
C2 C 0.9321(2) 0.12339(16) 0.09138(15) 0.0242(7) Uani 1 1 d . . . 
H2A H 0.9128 0.1129 0.1343 0.029 Uiso 1 1 calc R . . 
C3 C 0.9687(3) 0.19924(18) 0.08933(18) 0.0335(8) Uani 1 1 d . . . 
H3A H 0.9223 0.2326 0.1019 0.050 Uiso 1 1 calc R . . 
H3B H 0.9878 0.2104 0.0474 0.050 Uiso 1 1 calc R . . 
H3C H 1.0192 0.2032 0.1173 0.050 Uiso 1 1 calc R . . 
C4 C 1.0847(2) 0.06792(17) 0.10954(16) 0.0251(7) Uani 1 1 d . . . 
C5 C 1.0850(3) 0.08565(18) 0.17142(17) 0.0315(8) Uani 1 1 d . . . 
H5A H 1.0313 0.1000 0.1903 0.038 Uiso 1 1 calc R . . 
C6 C 1.1617(3) 0.08290(19) 0.20630(19) 0.0376(9) Uani 1 1 d . . . 
H6A H 1.1600 0.0951 0.2486 0.045 Uiso 1 1 calc R . . 
C7 C 1.2410(3) 0.0623(2) 0.1795(2) 0.0438(10) Uani 1 1 d . . . 
H7A H 1.2936 0.0599 0.2032 0.053 Uiso 1 1 calc R . . 
C8 C 1.2422(3) 0.0450(2) 0.1175(2) 0.0403(9) Uani 1 1 d . . . 
H8A H 1.2961 0.0313 0.0984 0.048 Uiso 1 1 calc R . . 
C9 C 1.1649(2) 0.04789(18) 0.08347(18) 0.0320(8) Uani 1 1 d . . . 
H9A H 1.1667 0.0359 0.0411 0.038 Uiso 1 1 calc R . . 
C10 C 0.6265(2) -0.06655(17) -0.09079(14) 0.0206(6) Uani 1 1 d . . . 
C11 C 0.6829(2) -0.00863(16) -0.09785(13) 0.0207(6) Uani 1 1 d . . . 
C12 C 0.7321(2) -0.00070(18) -0.15271(14) 0.0251(7) Uani 1 1 d . . . 
H12A H 0.7709 0.0386 -0.1572 0.030 Uiso 1 1 calc R . . 
C13 C 0.7244(2) -0.04913(17) -0.19981(15) 0.0269(7) Uani 1 1 d . . . 
H13A H 0.7593 -0.0435 -0.2358 0.032 Uiso 1 1 calc R . . 
C14 C 0.6654(2) -0.10693(17) -0.19524(14) 0.0243(7) Uani 1 1 d . . . 
C15 C 0.6551(3) -0.15547(19) -0.24447(16) 0.0321(8) Uani 1 1 d . . . 
H15A H 0.6892 -0.1497 -0.2807 0.038 Uiso 1 1 calc R . . 
C16 C 0.5968(3) -0.21005(19) -0.24023(17) 0.0339(8) Uani 1 1 d . . . 
H16A H 0.5890 -0.2415 -0.2739 0.041 Uiso 1 1 calc R . . 
C17 C 0.5477(3) -0.22005(18) -0.18585(17) 0.0315(8) Uani 1 1 d . . . 
H17A H 0.5071 -0.2583 -0.1831 0.038 Uiso 1 1 calc R . . 
C18 C 0.5579(2) -0.17533(17) -0.13694(16) 0.0261(7) Uani 1 1 d . . . 
H18A H 0.5255 -0.1838 -0.1003 0.031 Uiso 1 1 calc R . . 
C19 C 0.6164(2) -0.11637(17) -0.14015(15) 0.0230(7) Uani 1 1 d . . . 
C20 C 0.5763(2) -0.07905(15) -0.03243(16) 0.0216(6) Uani 1 1 d . . . 
C21 C 0.6179(2) -0.09843(16) 0.02235(14) 0.0219(7) Uani 1 1 d . . . 
C22 C 0.5650(2) -0.11289(18) 0.07472(16) 0.0289(7) Uani 1 1 d . . . 
H22A H 0.5930 -0.1257 0.1121 0.035 Uiso 1 1 calc R . . 
C23 C 0.4750(2) -0.10884(19) 0.07262(19) 0.0338(8) Uani 1 1 d . . . 
H23A H 0.4416 -0.1195 0.1084 0.041 Uiso 1 1 calc R . . 
C24 C 0.4303(2) -0.08917(18) 0.01852(17) 0.0294(8) Uani 1 1 d . . . 
C25 C 0.3366(3) -0.0857(2) 0.0149(2) 0.0411(10) Uani 1 1 d . . . 
H25A H 0.3023 -0.0974 0.0500 0.049 Uiso 1 1 calc R . . 
C26 C 0.2950(2) -0.06610(19) -0.0373(2) 0.0440(10) Uani 1 1 d . . . 
H26A H 0.2322 -0.0640 -0.0386 0.053 Uiso 1 1 calc R . . 
C27 C 0.3450(3) -0.0488(2) -0.0902(2) 0.0403(10) Uani 1 1 d . . . 
H27A H 0.3156 -0.0345 -0.1267 0.048 Uiso 1 1 calc R . . 
C28 C 0.4359(2) -0.05255(18) -0.08905(17) 0.0302(8) Uani 1 1 d . . . 
H28A H 0.4688 -0.0411 -0.1249 0.036 Uiso 1 1 calc R . . 
C29 C 0.4810(2) -0.07343(15) -0.03490(18) 0.0254(6) Uani 1 1 d . . . 
C31 C 0.9755(2) -0.05456(16) 0.14718(15) 0.0236(7) Uani 1 1 d . . . 
C32 C 1.0587(2) -0.08590(17) 0.15444(16) 0.0250(7) Uani 1 1 d . . . 
H32A H 1.0937 -0.0964 0.1194 0.030 Uiso 1 1 calc R . . 
C33 C 1.0905(2) -0.10171(19) 0.21259(16) 0.0303(8) Uani 1 1 d . . . 
H33A H 1.1470 -0.1233 0.2173 0.036 Uiso 1 1 calc R . . 
C34 C 1.0394(3) -0.0858(2) 0.26436(18) 0.0414(10) Uani 1 1 d . . . 
H34A H 1.0611 -0.0965 0.3042 0.050 Uiso 1 1 calc R . . 
C35 C 0.9581(3) -0.0550(2) 0.25755(18) 0.0417(10) Uani 1 1 d . . . 
H35A H 0.9237 -0.0438 0.2927 0.050 Uiso 1 1 calc R . . 
C36 C 0.9251(3) -0.0398(2) 0.19857(16) 0.0310(8) Uani 1 1 d . . . 
H36A H 0.8680 -0.0193 0.1941 0.037 Uiso 1 1 calc R . . 
C41 C 0.9980(2) -0.07825(18) 0.01930(16) 0.0267(7) Uani 1 1 d . . . 
C42 C 0.9948(2) -0.15193(18) 0.02911(18) 0.0328(8) Uani 1 1 d . . . 
H42A H 0.9699 -0.1700 0.0660 0.039 Uiso 1 1 calc R . . 
C43 C 1.0278(3) -0.1987(2) -0.01503(19) 0.0411(10) Uani 1 1 d . . . 
H43A H 1.0245 -0.2483 -0.0082 0.049 Uiso 1 1 calc R . . 
C44 C 1.0644(3) -0.1736(2) -0.0676(2) 0.0459(11) Uani 1 1 d . . . 
H44A H 1.0881 -0.2058 -0.0968 0.055 Uiso 1 1 calc R . . 
C45 C 1.0676(3) -0.1004(3) -0.07904(18) 0.0414(10) Uani 1 1 d . . . 
H45A H 1.0930 -0.0831 -0.1160 0.050 Uiso 1 1 calc R . . 
C46 C 1.0335(2) -0.0538(2) -0.03608(17) 0.0321(7) Uani 1 1 d . . . 
H46A H 1.0343 -0.0043 -0.0443 0.039 Uiso 1 1 calc R . . 
C51 C 0.7609(2) -0.15812(17) 0.09596(15) 0.0239(7) Uani 1 1 d . . . 
C52 C 0.7452(3) -0.13116(19) 0.15419(16) 0.0325(8) Uani 1 1 d . . . 
H52A H 0.7244 -0.0839 0.1583 0.039 Uiso 1 1 calc R . . 
C53 C 0.7591(3) -0.1713(2) 0.20635(18) 0.0412(10) Uani 1 1 d . . . 
H53A H 0.7454 -0.1522 0.2456 0.049 Uiso 1 1 calc R . . 
C54 C 0.7933(3) -0.2398(2) 0.20134(19) 0.0436(10) Uani 1 1 d . . . 
H54A H 0.8042 -0.2674 0.2370 0.052 Uiso 1 1 calc R . . 
C55 C 0.8108(3) -0.2664(2) 0.14421(19) 0.0423(10) Uani 1 1 d . . . 
H55A H 0.8340 -0.3130 0.1403 0.051 Uiso 1 1 calc R . . 
C56 C 0.7952(3) -0.22641(17) 0.09184(16) 0.0312(7) Uani 1 1 d . . . 
H56A H 0.8082 -0.2459 0.0526 0.037 Uiso 1 1 calc R . . 
C61 C 0.7689(2) -0.15829(15) -0.03594(16) 0.0220(6) Uani 1 1 d . . . 
C62 C 0.8334(2) -0.14089(18) -0.07799(15) 0.0253(7) Uani 1 1 d . . . 
H62A H 0.8656 -0.0980 -0.0733 0.030 Uiso 1 1 calc R . . 
C63 C 0.8520(3) -0.1855(2) -0.12734(17) 0.0367(9) Uani 1 1 d . . . 
H63A H 0.8971 -0.1733 -0.1558 0.044 Uiso 1 1 calc R . . 
C64 C 0.8043(3) -0.2478(2) -0.13481(17) 0.0394(9) Uani 1 1 d . . . 
H64A H 0.8166 -0.2782 -0.1685 0.047 Uiso 1 1 calc R . . 
C65 C 0.7397(3) -0.26552(19) -0.09372(18) 0.0370(9) Uani 1 1 d . . . 
H65A H 0.7070 -0.3081 -0.0992 0.044 Uiso 1 1 calc R . . 
C66 C 0.7214(2) -0.22161(17) -0.04390(17) 0.0289(7) Uani 1 1 d . . . 
H66A H 0.6768 -0.2345 -0.0153 0.035 Uiso 1 1 calc R . . 
C71 C 0.7443(2) 0.13420(16) -0.07250(15) 0.0237(7) Uani 1 1 d . . . 
C72 C 0.8331(2) 0.13418(18) -0.09285(16) 0.0274(7) Uani 1 1 d . . . 
H72A H 0.8678 0.0925 -0.0884 0.033 Uiso 1 1 calc R . . 
C73 C 0.8701(3) 0.1933(2) -0.11891(18) 0.0353(8) Uani 1 1 d . . . 
H73A H 0.9299 0.1921 -0.1324 0.042 Uiso 1 1 calc R . . 
C74 C 0.8207(3) 0.2551(2) -0.12569(18) 0.0373(9) Uani 1 1 d . . . 
H74A H 0.8464 0.2959 -0.1441 0.045 Uiso 1 1 calc R . . 
C75 C 0.7351(3) 0.25661(19) -0.10562(19) 0.0382(9) Uani 1 1 d . . . 
H75A H 0.7010 0.2986 -0.1101 0.046 Uiso 1 1 calc R . . 
C76 C 0.6971(3) 0.19659(17) -0.07850(16) 0.0294(7) Uani 1 1 d . . . 
H76A H 0.6379 0.1988 -0.0640 0.035 Uiso 1 1 calc R . . 
C81 C 0.5849(2) 0.08154(16) -0.01868(15) 0.0219(7) Uani 1 1 d . . . 
C82 C 0.5531(2) 0.08266(18) 0.04190(16) 0.0280(7) Uani 1 1 d . . . 
H82A H 0.5911 0.0704 0.0750 0.034 Uiso 1 1 calc R . . 
C83 C 0.4658(3) 0.1018(2) 0.05334(17) 0.0369(9) Uani 1 1 d . . . 
H83A H 0.4444 0.1015 0.0944 0.044 Uiso 1 1 calc R . . 
C84 C 0.4092(3) 0.1214(2) 0.00624(19) 0.0359(9) Uani 1 1 d . . . 
H84A H 0.3501 0.1356 0.0149 0.043 Uiso 1 1 calc R . . 
C85 C 0.4402(2) 0.12009(17) -0.05435(16) 0.0275(7) Uani 1 1 d . . . 
H85A H 0.4019 0.1328 -0.0871 0.033 Uiso 1 1 calc R . . 
C86 C 0.5274(2) 0.10007(17) -0.06653(16) 0.0253(7) Uani 1 1 d . . . 
H86A H 0.5480 0.0990 -0.1077 0.030 Uiso 1 1 calc R . . 
C1S C 0.8381(4) -0.3287(3) -0.4418(3) 0.0679(15) Uani 1 1 d . . . 
H1SA H 0.8550 -0.3381 -0.4830 0.082 Uiso 1 1 calc R . . 
C2S C 0.8050(4) -0.3820(3) -0.4066(2) 0.0648(14) Uani 1 1 d . . . 
H2SA H 0.7995 -0.4284 -0.4230 0.078 Uiso 1 1 calc R . . 
C3S C 0.7795(4) -0.3684(3) -0.3471(3) 0.0676(15) Uani 1 1 d . . . 
H3SA H 0.7586 -0.4059 -0.3217 0.081 Uiso 1 1 calc R . . 
C4S C 0.7844(4) -0.3009(3) -0.3246(3) 0.0711(16) Uani 1 1 d . . . 
H4SA H 0.7636 -0.2906 -0.2844 0.085 Uiso 1 1 calc R . . 
C5S C 0.8194(4) -0.2481(3) -0.3601(3) 0.0713(17) Uani 1 1 d . . . 
H5SA H 0.8244 -0.2015 -0.3440 0.086 Uiso 1 1 calc R . . 
C6S C 0.8472(5) -0.2619(3) -0.4188(3) 0.0714(16) Uani 1 1 d . . . 
H6SA H 0.8726 -0.2254 -0.4432 0.086 Uiso 1 1 calc R . . 
C7S C 1.4942(9) -0.0670(8) 0.2659(6) 0.148(5) Uani 0.50 1 d PD . . 
H7SA H 1.5315 -0.1063 0.2520 0.222 Uiso 0.50 1 calc PR . . 
H7SB H 1.4318 -0.0792 0.2597 0.222 Uiso 0.50 1 calc PR . . 
H7SC H 1.5049 -0.0583 0.3097 0.222 Uiso 0.50 1 calc PR . . 
C8S C 1.5168(8) 0.0000(7) 0.2292(5) 0.148(5) Uani 0.50 1 d PD . . 
H8SA H 1.5061 -0.0092 0.1850 0.177 Uiso 0.50 1 calc PR . . 
H8SB H 1.5805 0.0109 0.2343 0.177 Uiso 0.50 1 calc PR . . 
C9S C 1.4620(7) 0.0645(7) 0.2493(6) 0.148(5) Uani 0.50 1 d PD . . 
H9SA H 1.4499 0.0621 0.2939 0.177 Uiso 0.50 1 calc PR . . 
H9SB H 1.4047 0.0653 0.2272 0.177 Uiso 0.50 1 calc PR . . 
C10S C 1.5156(8) 0.1315(7) 0.2341(6) 0.148(5) Uani 0.50 1 d PD . . 
H10A H 1.5735 0.1293 0.2553 0.177 Uiso 0.50 1 calc PR . . 
H10B H 1.5267 0.1334 0.1894 0.177 Uiso 0.50 1 calc PR . . 
C11S C 1.4662(10) 0.1987(8) 0.2542(6) 0.148(5) Uani 0.50 1 d PD . . 
H11A H 1.5030 0.2404 0.2458 0.222 Uiso 0.50 1 calc PR . . 
H11B H 1.4536 0.1962 0.2983 0.222 Uiso 0.50 1 calc PR . . 
H11C H 1.4105 0.2026 0.2314 0.222 Uiso 0.50 1 calc PR . . 
   
loop_ 
 _atom_site_aniso_label 
 _atom_site_aniso_U_11 
 _atom_site_aniso_U_22 
 _atom_site_aniso_U_33 
 _atom_site_aniso_U_23 
 _atom_site_aniso_U_13 
 _atom_site_aniso_U_12 
Ru1 0.01883(12) 0.01621(11) 0.02046(11) 0.00049(9) -0.00086(10) 0.00018(9) 
Cl1 0.0295(4) 0.0270(4) 0.0230(4) -0.0023(3) -0.0016(3) 0.0056(3) 
P1 0.0193(4) 0.0180(4) 0.0227(4) -0.0008(3) -0.0015(3) 0.0006(3) 
P2 0.0201(4) 0.0164(3) 0.0209(4) 0.0012(3) 0.0008(3) 0.0002(3) 
P3 0.0172(4) 0.0169(3) 0.0210(3) 0.0010(3) 0.0001(4) 0.0004(3) 
N1 0.0256(15) 0.0176(12) 0.0318(15) 0.0006(11) -0.0035(11) 0.0010(11) 
C1 0.0227(17) 0.0225(15) 0.0231(15) 0.0001(13) -0.0006(13) -0.0030(13) 
C2 0.0253(18) 0.0194(15) 0.0280(16) -0.0001(13) -0.0042(13) -0.0012(13) 
C3 0.036(2) 0.0198(16) 0.045(2) 0.0026(15) -0.0048(17) -0.0064(15) 
C4 0.0236(17) 0.0190(15) 0.0326(17) 0.0031(13) -0.0008(14) -0.0033(12) 
C5 0.033(2) 0.0268(18) 0.0350(19) -0.0002(15) -0.0072(16) -0.0046(14) 
C6 0.042(2) 0.0289(18) 0.042(2) -0.0009(16) -0.0168(18) -0.0030(16) 
C7 0.036(2) 0.033(2) 0.062(3) 0.009(2) -0.025(2) -0.0076(17) 
C8 0.0246(19) 0.0324(19) 0.064(3) 0.0044(19) -0.0009(18) -0.0024(15) 
C9 0.0279(19) 0.0273(17) 0.041(2) 0.0025(15) 0.0002(15) -0.0041(14) 
C10 0.0184(16) 0.0202(15) 0.0232(15) 0.0018(12) -0.0008(12) 0.0033(12) 
C11 0.0206(15) 0.0202(13) 0.0212(13) 0.0003(12) -0.0019(11) 0.0033(12) 
C12 0.0234(15) 0.0261(17) 0.0259(14) 0.0013(13) 0.0011(12) 0.0014(13) 
C13 0.0276(18) 0.0299(17) 0.0233(15) 0.0026(14) 0.0030(13) 0.0032(14) 
C14 0.0284(17) 0.0235(15) 0.0209(15) 0.0014(13) -0.0023(13) 0.0052(13) 
C15 0.041(2) 0.0306(18) 0.0250(17) -0.0013(14) -0.0028(15) 0.0060(16) 
C16 0.045(2) 0.0263(17) 0.0302(18) -0.0092(15) -0.0074(16) 0.0018(16) 
C17 0.040(2) 0.0215(16) 0.0335(18) -0.0041(14) -0.0064(16) 0.0008(15) 
C18 0.0287(18) 0.0223(16) 0.0274(17) -0.0036(13) -0.0055(14) 0.0019(13) 
C19 0.0219(17) 0.0226(15) 0.0246(16) 0.0016(13) -0.0042(13) 0.0031(13) 
C20 0.0188(15) 0.0156(13) 0.0304(16) -0.0052(13) 0.0046(14) -0.0017(11) 
C21 0.0269(17) 0.0171(14) 0.0216(15) -0.0010(12) 0.0038(12) -0.0018(12) 
C22 0.0286(19) 0.0282(17) 0.0298(17) 0.0038(14) 0.0055(15) -0.0035(14) 
C23 0.0256(19) 0.0320(18) 0.044(2) 0.0028(17) 0.0143(16) -0.0030(15) 
C24 0.0193(17) 0.0230(16) 0.046(2) -0.0010(15) 0.0075(15) -0.0048(13) 
C25 0.0269(19) 0.0328(19) 0.064(3) -0.0017(18) 0.0129(19) -0.0035(16) 
C26 0.0175(17) 0.0311(17) 0.083(3) -0.010(2) -0.001(2) -0.0009(14) 
C27 0.029(2) 0.0299(19) 0.062(3) -0.0104(19) -0.0118(19) 0.0025(16) 
C28 0.0252(18) 0.0234(16) 0.042(2) -0.0058(15) -0.0041(15) 0.0014(14) 
C29 0.0190(15) 0.0172(13) 0.0400(18) -0.0051(15) -0.0009(15) 0.0001(11) 
C31 0.0265(17) 0.0194(15) 0.0249(15) 0.0003(13) -0.0010(13) -0.0016(13) 
C32 0.0263(18) 0.0224(16) 0.0263(16) 0.0009(13) -0.0018(14) 0.0013(13) 
C33 0.0262(19) 0.0304(17) 0.0343(18) 0.0025(15) -0.0048(14) 0.0058(14) 
C34 0.037(2) 0.057(3) 0.0301(18) 0.0091(18) -0.0039(17) 0.0151(19) 
C35 0.033(2) 0.061(3) 0.0308(19) 0.0080(19) 0.0036(16) 0.0108(19) 
C36 0.0278(19) 0.0386(19) 0.0265(17) 0.0035(15) -0.0006(14) 0.0042(15) 
C41 0.0208(17) 0.0289(17) 0.0304(18) -0.0061(14) -0.0061(13) 0.0048(13) 
C42 0.0303(19) 0.0302(17) 0.038(2) -0.0070(16) -0.0122(16) 0.0068(14) 
C43 0.037(2) 0.037(2) 0.049(2) -0.0151(18) -0.0144(19) 0.0165(17) 
C44 0.034(2) 0.056(3) 0.048(2) -0.029(2) -0.010(2) 0.018(2) 
C45 0.025(2) 0.066(3) 0.0332(19) -0.016(2) 0.0010(16) -0.0024(19) 
C46 0.0248(17) 0.0405(19) 0.0311(17) -0.0077(18) 0.0008(16) -0.0029(14) 
C51 0.0228(17) 0.0223(15) 0.0265(16) 0.0039(13) -0.0012(13) -0.0018(13) 
C52 0.047(2) 0.0265(17) 0.0243(16) 0.0034(14) -0.0031(16) 0.0018(16) 
C53 0.058(3) 0.036(2) 0.0294(18) 0.0065(16) 0.0017(18) 0.0001(19) 
C54 0.057(3) 0.0346(19) 0.039(2) 0.0138(17) -0.005(2) 0.001(2) 
C55 0.052(3) 0.0280(18) 0.047(2) 0.0090(16) -0.003(2) 0.0099(18) 
C56 0.034(2) 0.0252(16) 0.0347(18) 0.0033(14) -0.0024(16) 0.0047(16) 
C61 0.0187(14) 0.0195(14) 0.0278(15) 0.0014(14) -0.0027(14) 0.0048(11) 
C62 0.0235(17) 0.0293(16) 0.0231(16) -0.0013(13) -0.0016(13) 0.0035(13) 
C63 0.032(2) 0.051(2) 0.0268(18) -0.0057(17) -0.0016(16) 0.0114(18) 
C64 0.043(2) 0.042(2) 0.0325(18) -0.0185(16) -0.0124(19) 0.0162(19) 
C65 0.043(2) 0.0257(17) 0.043(2) -0.0086(16) -0.0177(18) 0.0074(16) 
C66 0.0290(18) 0.0223(15) 0.0355(18) -0.0003(14) -0.0067(15) 0.0004(13) 
C71 0.0245(17) 0.0204(15) 0.0262(16) -0.0012(13) -0.0025(14) -0.0023(13) 
C72 0.0254(18) 0.0273(17) 0.0295(18) 0.0016(14) 0.0026(14) -0.0016(14) 
C73 0.034(2) 0.039(2) 0.0337(19) 0.0013(16) 0.0068(16) -0.0071(16) 
C74 0.045(3) 0.0283(18) 0.039(2) 0.0070(16) 0.0054(17) -0.0091(16) 
C75 0.048(2) 0.0215(17) 0.045(2) 0.0083(16) 0.0014(19) -0.0001(16) 
C76 0.0319(19) 0.0234(15) 0.0329(17) 0.0010(13) 0.0042(16) -0.0011(15) 
C81 0.0204(16) 0.0164(14) 0.0290(17) -0.0010(12) 0.0006(13) -0.0004(12) 
C82 0.0240(17) 0.0331(17) 0.0269(16) 0.0001(15) -0.0006(15) 0.0014(13) 
C83 0.0256(19) 0.053(2) 0.0326(19) -0.0063(17) 0.0043(15) 0.0046(17) 
C84 0.0217(19) 0.040(2) 0.046(2) -0.0024(18) 0.0015(16) 0.0056(15) 
C85 0.0217(17) 0.0239(16) 0.0368(18) -0.0029(14) -0.0045(14) 0.0054(13) 
C86 0.0238(17) 0.0218(15) 0.0304(17) -0.0022(14) 0.0005(14) 0.0012(13) 
C1S 0.085(4) 0.064(3) 0.055(3) -0.018(3) 0.012(3) -0.012(3) 
C2S 0.068(3) 0.053(3) 0.074(3) -0.023(3) 0.017(3) -0.016(3) 
C3S 0.069(4) 0.069(3) 0.065(3) -0.003(3) 0.016(3) -0.020(3) 
C4S 0.086(5) 0.076(4) 0.051(3) -0.012(3) 0.013(3) 0.014(3) 
C5S 0.092(5) 0.045(3) 0.077(4) -0.018(3) -0.015(3) 0.017(3) 
C6S 0.101(5) 0.048(3) 0.065(3) 0.004(3) -0.009(3) -0.003(3) 
C7S 0.060(4) 0.339(14) 0.044(3) 0.034(6) -0.010(3) -0.013(6) 
C8S 0.060(4) 0.339(14) 0.044(3) 0.034(6) -0.010(3) -0.013(6) 
C9S 0.060(4) 0.339(14) 0.044(3) 0.034(6) -0.010(3) -0.013(6) 
C10S 0.060(4) 0.339(14) 0.044(3) 0.034(6) -0.010(3) -0.013(6) 
C11S 0.060(4) 0.339(14) 0.044(3) 0.034(6) -0.010(3) -0.013(6) 
   
_geom_special_details 
; 
 All esds (except the esd in the dihedral angle between two l.s. planes) 
 are estimated using the full covariance matrix.  The cell esds are taken 
 into account individually in the estimation of esds in distances, angles 
 and torsion angles; correlations between esds in cell parameters are only 
 used when they are defined by crystal symmetry.  An approximate (isotropic) 
 treatment of cell esds is used for estimating esds involving l.s. planes. 
; 
   
loop_ 
 _geom_bond_atom_site_label_1 
 _geom_bond_atom_site_label_2 
 _geom_bond_distance 
 _geom_bond_site_symmetry_2 
 _geom_bond_publ_flag 
Ru1 H1RU 1.53(3) . ? 
Ru1 N1 2.184(3) . ? 
Ru1 P2 2.2738(8) . ? 
Ru1 P3 2.3139(8) . ? 
Ru1 P1 2.3146(8) . ? 
Ru1 Cl1 2.5626(8) . ? 
P1 C41 1.830(3) . ? 
P1 C31 1.834(3) . ? 
P1 C1 1.906(3) . ? 
P2 C61 1.848(3) . ? 
P2 C51 1.857(3) . ? 
P2 C21 1.866(3) . ? 
P3 C81 1.836(3) . ? 
P3 C11 1.846(3) . ? 
P3 C71 1.859(3) . ? 
N1 C2 1.482(4) . ? 
C1 C4 1.513(5) . ? 
C1 C2 1.531(5) . ? 
C2 C3 1.535(4) . ? 
C4 C5 1.389(5) . ? 
C4 C9 1.391(5) . ? 
C5 C6 1.386(5) . ? 
C6 C7 1.389(6) . ? 
C7 C8 1.389(7) . ? 
C8 C9 1.384(6) . ? 
C10 C11 1.394(4) . ? 
C10 C19 1.437(4) . ? 
C10 C20 1.500(5) . ? 
C11 C12 1.415(4) . ? 
C12 C13 1.379(5) . ? 
C13 C14 1.412(5) . ? 
C14 C15 1.419(5) . ? 
C14 C19 1.422(5) . ? 
C15 C16 1.358(6) . ? 
C16 C17 1.410(5) . ? 
C17 C18 1.368(5) . ? 
C18 C19 1.422(5) . ? 
C20 C21 1.398(5) . ? 
C20 C29 1.445(4) . ? 
C21 C22 1.420(5) . ? 
C22 C23 1.363(5) . ? 
C23 C24 1.408(6) . ? 
C24 C25 1.420(5) . ? 
C24 C29 1.424(5) . ? 
C25 C26 1.351(6) . ? 
C26 C27 1.417(6) . ? 
C27 C28 1.375(5) . ? 
C28 C29 1.418(5) . ? 
C31 C36 1.382(5) . ? 
C31 C32 1.399(5) . ? 
C32 C33 1.388(5) . ? 
C33 C34 1.400(6) . ? 
C34 C35 1.367(6) . ? 
C35 C36 1.408(5) . ? 
C41 C46 1.399(5) . ? 
C41 C42 1.407(5) . ? 
C42 C43 1.397(5) . ? 
C43 C44 1.357(6) . ? 
C44 C45 1.404(7) . ? 
C45 C46 1.384(5) . ? 
C51 C52 1.387(5) . ? 
C51 C56 1.392(5) . ? 
C52 C53 1.381(5) . ? 
C53 C54 1.397(6) . ? 
C54 C55 1.368(6) . ? 
C55 C56 1.388(5) . ? 
C61 C62 1.377(5) . ? 
C61 C66 1.404(4) . ? 
C62 C63 1.394(5) . ? 
C63 C64 1.389(6) . ? 
C64 C65 1.366(6) . ? 
C65 C66 1.393(5) . ? 
C71 C76 1.382(5) . ? 
C71 C72 1.413(5) . ? 
C72 C73 1.371(5) . ? 
C73 C74 1.392(6) . ? 
C74 C75 1.366(6) . ? 
C75 C76 1.400(5) . ? 
C81 C86 1.401(5) . ? 
C81 C82 1.405(5) . ? 
C82 C83 1.391(5) . ? 
C83 C84 1.386(6) . ? 
C84 C85 1.401(5) . ? 
C85 C86 1.396(5) . ? 
C1S C2S 1.360(7) . ? 
C1S C6S 1.362(7) . ? 
C2S C3S 1.377(7) . ? 
C3S C4S 1.368(8) . ? 
C4S C5S 1.367(8) . ? 
C5S C6S 1.372(8) . ? 
C7S C8S 1.535(2) . ? 
C8S C9S 1.536(2) . ? 
C9S C10S 1.537(2) . ? 
C10S C11S 1.536(2) . ? 
   
loop_ 
 _geom_angle_atom_site_label_1 
 _geom_angle_atom_site_label_2 
 _geom_angle_atom_site_label_3 
 _geom_angle 
 _geom_angle_site_symmetry_1 
 _geom_angle_site_symmetry_3 
 _geom_angle_publ_flag 
H1RU Ru1 N1 95.0(13) . . ? 
H1RU Ru1 P2 87.6(13) . . ? 
N1 Ru1 P2 177.22(8) . . ? 
H1RU Ru1 P3 75.1(13) . . ? 
N1 Ru1 P3 90.78(7) . . ? 
P2 Ru1 P3 90.66(3) . . ? 
H1RU Ru1 P1 81.8(14) . . ? 
N1 Ru1 P1 81.44(8) . . ? 
P2 Ru1 P1 98.19(3) . . ? 
P3 Ru1 P1 154.90(3) . . ? 
H1RU Ru1 Cl1 172.7(13) . . ? 
N1 Ru1 Cl1 78.56(8) . . ? 
P2 Ru1 Cl1 98.83(3) . . ? 
P3 Ru1 Cl1 101.21(3) . . ? 
P1 Ru1 Cl1 100.57(3) . . ? 
C41 P1 C31 101.73(15) . . ? 
C41 P1 C1 106.02(15) . . ? 
C31 P1 C1 99.38(14) . . ? 
C41 P1 Ru1 112.94(11) . . ? 
C31 P1 Ru1 131.27(11) . . ? 
C1 P1 Ru1 102.53(10) . . ? 
C61 P2 C51 101.83(14) . . ? 
C61 P2 C21 99.95(14) . . ? 
C51 P2 C21 103.11(15) . . ? 
C61 P2 Ru1 121.79(11) . . ? 
C51 P2 Ru1 114.93(11) . . ? 
C21 P2 Ru1 112.67(10) . . ? 
C81 P3 C11 100.92(14) . . ? 
C81 P3 C71 101.32(15) . . ? 
C11 P3 C71 103.16(14) . . ? 
C81 P3 Ru1 126.44(11) . . ? 
C11 P3 Ru1 111.82(10) . . ? 
C71 P3 Ru1 110.46(11) . . ? 
C2 N1 Ru1 116.58(19) . . ? 
C4 C1 C2 114.6(3) . . ? 
C4 C1 P1 114.3(2) . . ? 
C2 C1 P1 105.5(2) . . ? 
N1 C2 C1 108.5(3) . . ? 
N1 C2 C3 109.8(3) . . ? 
C1 C2 C3 113.0(3) . . ? 
C5 C4 C9 117.3(3) . . ? 
C5 C4 C1 121.8(3) . . ? 
C9 C4 C1 120.9(3) . . ? 
C6 C5 C4 121.7(4) . . ? 
C5 C6 C7 120.1(4) . . ? 
C6 C7 C8 119.1(4) . . ? 
C9 C8 C7 120.0(4) . . ? 
C8 C9 C4 121.8(4) . . ? 
C11 C10 C19 119.7(3) . . ? 
C11 C10 C20 121.7(3) . . ? 
C19 C10 C20 118.6(3) . . ? 
C10 C11 C12 119.8(3) . . ? 
C10 C11 P3 120.1(2) . . ? 
C12 C11 P3 120.0(2) . . ? 
C13 C12 C11 121.0(3) . . ? 
C12 C13 C14 120.8(3) . . ? 
C13 C14 C15 121.0(3) . . ? 
C13 C14 C19 119.0(3) . . ? 
C15 C14 C19 120.0(3) . . ? 
C16 C15 C14 120.6(4) . . ? 
C15 C16 C17 120.0(3) . . ? 
C18 C17 C16 120.9(3) . . ? 
C17 C18 C19 120.9(3) . . ? 
C14 C19 C18 117.6(3) . . ? 
C14 C19 C10 119.6(3) . . ? 
C18 C19 C10 122.8(3) . . ? 
C21 C20 C29 120.0(3) . . ? 
C21 C20 C10 122.5(3) . . ? 
C29 C20 C10 117.5(3) . . ? 
C20 C21 C22 118.9(3) . . ? 
C20 C21 P2 121.1(2) . . ? 
C22 C21 P2 119.9(3) . . ? 
C23 C22 C21 121.6(3) . . ? 
C22 C23 C24 121.4(3) . . ? 
C23 C24 C25 122.5(3) . . ? 
C23 C24 C29 118.8(3) . . ? 
C25 C24 C29 118.8(4) . . ? 
C26 C25 C24 121.6(4) . . ? 
C25 C26 C27 120.0(3) . . ? 
C28 C27 C26 120.4(4) . . ? 
C27 C28 C29 120.6(4) . . ? 
C28 C29 C24 118.6(3) . . ? 
C28 C29 C20 122.0(3) . . ? 
C24 C29 C20 119.3(3) . . ? 
C36 C31 C32 119.3(3) . . ? 
C36 C31 P1 118.6(3) . . ? 
C32 C31 P1 121.5(3) . . ? 
C33 C32 C31 120.4(3) . . ? 
C32 C33 C34 119.9(3) . . ? 
C35 C34 C33 120.0(4) . . ? 
C34 C35 C36 120.2(4) . . ? 
C31 C36 C35 120.2(3) . . ? 
C46 C41 C42 118.1(3) . . ? 
C46 C41 P1 122.6(3) . . ? 
C42 C41 P1 118.4(3) . . ? 
C43 C42 C41 120.4(4) . . ? 
C44 C43 C42 120.5(4) . . ? 
C43 C44 C45 120.4(4) . . ? 
C46 C45 C44 119.5(4) . . ? 
C45 C46 C41 121.0(4) . . ? 
C52 C51 C56 117.5(3) . . ? 
C52 C51 P2 118.2(2) . . ? 
C56 C51 P2 124.2(3) . . ? 
C53 C52 C51 121.7(3) . . ? 
C52 C53 C54 119.9(4) . . ? 
C55 C54 C53 118.8(4) . . ? 
C54 C55 C56 121.0(3) . . ? 
C55 C56 C51 120.9(3) . . ? 
C62 C61 C66 118.8(3) . . ? 
C62 C61 P2 121.8(2) . . ? 
C66 C61 P2 119.4(3) . . ? 
C61 C62 C63 120.8(3) . . ? 
C64 C63 C62 119.8(4) . . ? 
C65 C64 C63 120.0(3) . . ? 
C64 C65 C66 120.5(4) . . ? 
C65 C66 C61 120.1(3) . . ? 
C76 C71 C72 117.4(3) . . ? 
C76 C71 P3 123.1(3) . . ? 
C72 C71 P3 119.3(2) . . ? 
C73 C72 C71 121.1(3) . . ? 
C72 C73 C74 120.4(4) . . ? 
C75 C74 C73 119.4(3) . . ? 
C74 C75 C76 120.4(4) . . ? 
C71 C76 C75 121.2(4) . . ? 
C86 C81 C82 118.9(3) . . ? 
C86 C81 P3 121.4(3) . . ? 
C82 C81 P3 119.7(2) . . ? 
C83 C82 C81 119.8(3) . . ? 
C84 C83 C82 121.5(4) . . ? 
C83 C84 C85 119.1(3) . . ? 
C86 C85 C84 120.0(3) . . ? 
C85 C86 C81 120.7(3) . . ? 
C2S C1S C6S 120.9(5) . . ? 
C1S C2S C3S 119.8(5) . . ? 
C4S C3S C2S 119.7(5) . . ? 
C5S C4S C3S 119.8(5) . . ? 
C4S C5S C6S 120.6(5) . . ? 
C1S C6S C5S 119.1(6) . . ? 
C7S C8S C9S 112.6(6) . . ? 
C8S C9S C10S 107.8(6) . . ? 
C11S C10S C9S 111.3(6) . . ? 
   
_diffrn_measured_fraction_theta_max    0.998 
_diffrn_reflns_theta_full              27.47 
_diffrn_measured_fraction_theta_full   0.998 
_refine_diff_density_max    1.367 
_refine_diff_density_min   -0.483 
_refine_diff_density_rms    0.091 

#===end

data_complex_4 
 
_audit_creation_method            SHELXL-97 
_chemical_name_systematic 
; 
 ? 
; 
_chemical_name_common             ? 
_chemical_melting_point           ? 
_chemical_formula_moiety          ? 
_chemical_formula_sum 
 'C52 H70 Cl0.80 N0.80 O0.80 P2.40 Ru0.80' 
_chemical_formula_weight          902.63 
 
loop_ 
 _atom_type_symbol 
 _atom_type_description 
 _atom_type_scat_dispersion_real 
 _atom_type_scat_dispersion_imag 
 _atom_type_scat_source 
 'C'  'C'   0.0033   0.0016 
 'International Tables Vol C Tables 4.2.6.8 and 6.1.1.4' 
 'H'  'H'   0.0000   0.0000 
 'International Tables Vol C Tables 4.2.6.8 and 6.1.1.4' 
 'N'  'N'   0.0061   0.0033 
 'International Tables Vol C Tables 4.2.6.8 and 6.1.1.4' 
 'P'  'P'   0.1023   0.0942 
 'International Tables Vol C Tables 4.2.6.8 and 6.1.1.4' 
 'Cl'  'Cl'   0.1484   0.1585 
 'International Tables Vol C Tables 4.2.6.8 and 6.1.1.4' 
 'Ru'  'Ru'  -1.2594   0.8363 
 'International Tables Vol C Tables 4.2.6.8 and 6.1.1.4' 
 'O'  'O'   0.0106   0.0060 
 'International Tables Vol C Tables 4.2.6.8 and 6.1.1.4' 
 
_symmetry_cell_setting            ? 
_symmetry_space_group_name_H-M    ? 
 
loop_ 
 _symmetry_equiv_pos_as_xyz 
 'x, y, z' 
 '-x, y+1/2, -z' 
 
_cell_length_a                    17.667(4) 
_cell_length_b                    11.113(2) 
_cell_length_c                    33.147(7) 
_cell_angle_alpha                 90.00 
_cell_angle_beta                  90.35(3) 
_cell_angle_gamma                 90.00 
_cell_volume                      6508(2) 
_cell_formula_units_Z             5 
_cell_measurement_temperature     293(2) 
_cell_measurement_reflns_used     ? 
_cell_measurement_theta_min       ? 
_cell_measurement_theta_max       ? 
 
_exptl_crystal_description        ? 
_exptl_crystal_colour             ? 
_exptl_crystal_size_max           ? 
_exptl_crystal_size_mid           ? 
_exptl_crystal_size_min           ? 
_exptl_crystal_density_meas       ? 
_exptl_crystal_density_diffrn     1.152 
_exptl_crystal_density_method     'not measured' 
_exptl_crystal_F_000              2394 
_exptl_absorpt_coefficient_mu     0.393 
_exptl_absorpt_correction_type    ? 
_exptl_absorpt_correction_T_min   ? 
_exptl_absorpt_correction_T_max   ? 
_exptl_absorpt_process_details    ? 
 
_exptl_special_details 
; 
 ? 
; 
 
_diffrn_ambient_temperature       293(2) 
_diffrn_radiation_wavelength      0.71073 
_diffrn_radiation_type            MoK\a 
_diffrn_radiation_source          'fine-focus sealed tube' 
_diffrn_radiation_monochromator   graphite 
_diffrn_measurement_device_type   ? 
_diffrn_measurement_method        ? 
_diffrn_detector_area_resol_mean  ? 
_diffrn_standards_number          ? 
_diffrn_standards_interval_count  ? 
_diffrn_standards_interval_time   ? 
_diffrn_standards_decay_%         ? 
_diffrn_reflns_number             43330 
_diffrn_reflns_av_R_equivalents   0.0569 
_diffrn_reflns_av_sigmaI/netI     0.1191 
_diffrn_reflns_limit_h_min        -22 
_diffrn_reflns_limit_h_max        22 
_diffrn_reflns_limit_k_min        -13 
_diffrn_reflns_limit_k_max        14 
_diffrn_reflns_limit_l_min        -43 
_diffrn_reflns_limit_l_max        43 
_diffrn_reflns_theta_min          2.60 
_diffrn_reflns_theta_max          27.48 
_reflns_number_total              25483 
_reflns_number_gt                 16591 
_reflns_threshold_expression      >2sigma(I) 
 
_computing_data_collection        ? 
_computing_cell_refinement        ? 
_computing_data_reduction         ? 
_computing_structure_solution     'SHELXS-97 (Sheldrick, 1990)' 
_computing_structure_refinement   'SHELXL-97 (Sheldrick, 1997)' 
_computing_molecular_graphics     ? 
_computing_publication_material   ? 
 
_refine_special_details 
; 
 Refinement of F^2^ against ALL reflections.  The weighted R-factor wR and 
 goodness of fit S are based on F^2^, conventional R-factors R are based 
 on F, with F set to zero for negative F^2^. The threshold expression of 
 F^2^ > 2sigma(F^2^) is used only for calculating R-factors(gt) etc. and is 
 not relevant to the choice of reflections for refinement.  R-factors based 
 on F^2^ are statistically about twice as large as those based on F, and R- 
 factors based on ALL data will be even larger. 
; 
 
_refine_ls_structure_factor_coef  Fsqd  
_refine_ls_matrix_type            full 
_refine_ls_weighting_scheme       calc  
_refine_ls_weighting_details 
 'calc w=1/[\s^2^(Fo^2^)+(0.1190P)^2^+0.0000P] where P=(Fo^2^+2Fc^2^)/3' 
_atom_sites_solution_primary      direct 
_atom_sites_solution_secondary    difmap 
_atom_sites_solution_hydrogens    geom 
_refine_ls_hydrogen_treatment     mixed 
_refine_ls_extinction_method      none 
_refine_ls_extinction_coef        ? 
_refine_ls_abs_structure_details 
 'Flack H D (1983), Acta Cryst. A39, 876-881' 
_refine_ls_abs_structure_Flack    -0.06(3) 
_refine_ls_number_reflns          25483 
_refine_ls_number_parameters      1420 
_refine_ls_number_restraints      1 
_refine_ls_R_factor_all           0.1241 
_refine_ls_R_factor_gt            0.0662 
_refine_ls_wR_factor_ref          0.1965 
_refine_ls_wR_factor_gt           0.1585 
_refine_ls_goodness_of_fit_ref    0.969 
_refine_ls_restrained_S_all       0.969 
_refine_ls_shift/su_max           0.038 
_refine_ls_shift/su_mean          0.002 
 
loop_ 
 _atom_site_label 
 _atom_site_type_symbol 
 _atom_site_fract_x 
 _atom_site_fract_y 
 _atom_site_fract_z 
 _atom_site_U_iso_or_equiv 
 _atom_site_adp_type 
 _atom_site_occupancy 
 _atom_site_symmetry_multiplicity 
 _atom_site_calc_flag 
 _atom_site_refinement_flags 
 _atom_site_disorder_assembly 
 _atom_site_disorder_group 
Ru1 Ru -0.18407(3) 0.68105(5) 0.431629(15) 0.02603(14) Uani 1 1 d . . . 
H1RU H -0.145(6) 0.843(12) 0.442(3) 0.11(4) Uiso 1 1 d . . . 
Ru2 Ru 0.22417(3) -1.49059(5) 0.999117(16) 0.02691(14) Uani 1 1 d . . . 
H2RU H 0.187(3) -1.619(6) 0.9947(16) 0.008(14) Uiso 1 1 d . . . 
Cl1 Cl -0.21371(10) 0.45429(18) 0.42863(6) 0.0362(4) Uani 1 1 d . . . 
Cl2 Cl 0.26391(10) -1.26981(18) 1.00647(5) 0.0355(4) Uani 1 1 d . . . 
P1 P -0.29206(10) 0.73822(19) 0.46698(5) 0.0281(4) Uani 1 1 d . . . 
P2 P -0.22351(10) 0.73640(18) 0.36933(5) 0.0261(4) Uani 1 1 d . . . 
P3 P -0.05976(9) 0.67993(19) 0.40936(5) 0.0266(4) Uani 1 1 d . . . 
P4 P 0.27072(10) -1.55683(19) 1.06171(5) 0.0292(4) Uani 1 1 d . . . 
P5 P 0.14678(10) -1.47525(18) 0.94216(5) 0.0282(4) Uani 1 1 d . . . 
P6 P 0.31851(10) -1.55865(18) 0.95931(5) 0.0256(4) Uani 1 1 d . . . 
N1 N -0.1487(3) 0.6331(6) 0.49262(15) 0.0290(14) Uani 1 1 d . . . 
H1A H -0.1636 0.5571 0.4975 0.035 Uiso 1 1 calc R . . 
H1E H -0.0978 0.6340 0.4936 0.035 Uiso 1 1 calc R . . 
N2 N 0.1320(3) -1.4319(6) 1.03851(17) 0.0321(14) Uani 1 1 d . . . 
H2A H 0.1438 -1.3588 1.0484 0.038 Uiso 1 1 calc R . . 
H2C H 0.0898 -1.4236 1.0234 0.038 Uiso 1 1 calc R . . 
C1 C -0.1501(4) 0.6659(9) 0.5672(2) 0.046(2) Uani 1 1 d . . . 
H1B H -0.0958 0.6685 0.5684 0.069 Uiso 1 1 calc R . . 
H1C H -0.1670 0.5848 0.5713 0.069 Uiso 1 1 calc R . . 
H1D H -0.1706 0.7168 0.5878 0.069 Uiso 1 1 calc R . . 
C2 C -0.1773(4) 0.7105(7) 0.52556(19) 0.0347(18) Uani 1 1 d . . . 
H2B H -0.1582 0.7923 0.5214 0.042 Uiso 1 1 calc R . . 
C3 C -0.2639(4) 0.7124(7) 0.52169(18) 0.0313(18) Uani 1 1 d . . . 
H3A H -0.2788 0.6289 0.5269 0.038 Uiso 1 1 calc R . . 
C4 C -0.3059(4) 0.7837(8) 0.5535(2) 0.038(2) Uani 1 1 d . . . 
C5 C -0.3740(4) 0.7375(11) 0.5674(2) 0.056(3) Uani 1 1 d . . . 
H5A H -0.3923 0.6657 0.5566 0.068 Uiso 1 1 calc R . . 
C6 C -0.4149(5) 0.7957(12) 0.5966(3) 0.066(3) Uani 1 1 d . . . 
H6A H -0.4610 0.7649 0.6053 0.079 Uiso 1 1 calc R . . 
C7 C -0.3865(6) 0.9005(13) 0.6127(3) 0.081(4) Uani 1 1 d . . . 
H7A H -0.4137 0.9404 0.6326 0.097 Uiso 1 1 calc R . . 
C8 C -0.3178(6) 0.9481(12) 0.6000(3) 0.081(4) Uani 1 1 d . . . 
H8A H -0.2993 1.0196 0.6109 0.097 Uiso 1 1 calc R . . 
C9 C -0.2772(5) 0.8856(9) 0.5705(2) 0.052(2) Uani 1 1 d . . . 
H9A H -0.2301 0.9141 0.5624 0.063 Uiso 1 1 calc R . . 
C10 C -0.3846(4) 0.6653(8) 0.4690(2) 0.0332(18) Uani 1 1 d . . . 
C11 C -0.4525(4) 0.7227(8) 0.4765(2) 0.0378(18) Uani 1 1 d . . . 
H11A H -0.4527 0.8058 0.4797 0.045 Uiso 1 1 calc R . . 
C12 C -0.5210(4) 0.6596(9) 0.4793(2) 0.049(2) Uani 1 1 d . . . 
H12A H -0.5658 0.7007 0.4843 0.059 Uiso 1 1 calc R . . 
C13 C -0.5214(4) 0.5359(8) 0.4748(2) 0.044(2) Uani 1 1 d . . . 
H13A H -0.5666 0.4932 0.4761 0.053 Uiso 1 1 calc R . . 
C14 C -0.4550(4) 0.4774(8) 0.4682(2) 0.041(2) Uani 1 1 d . . . 
H14A H -0.4556 0.3941 0.4655 0.049 Uiso 1 1 calc R . . 
C15 C -0.3864(4) 0.5376(8) 0.4655(2) 0.040(2) Uani 1 1 d . . . 
H15A H -0.3418 0.4948 0.4615 0.048 Uiso 1 1 calc R . . 
C16 C -0.3179(4) 0.8970(8) 0.4596(2) 0.0352(18) Uani 1 1 d . . . 
C17 C -0.3725(4) 0.9273(8) 0.4297(2) 0.041(2) Uani 1 1 d . . . 
H17A H -0.4003 0.8672 0.4170 0.050 Uiso 1 1 calc R . . 
C18 C -0.3842(5) 1.0468(8) 0.4196(3) 0.051(2) Uani 1 1 d . . . 
H18A H -0.4198 1.0674 0.4000 0.061 Uiso 1 1 calc R . . 
C19 C -0.3416(5) 1.1369(9) 0.4392(3) 0.058(3) Uani 1 1 d . . . 
H19A H -0.3500 1.2172 0.4327 0.070 Uiso 1 1 calc R . . 
C20 C -0.2879(5) 1.1087(10) 0.4678(3) 0.055(2) Uani 1 1 d . . . 
H20A H -0.2598 1.1688 0.4804 0.066 Uiso 1 1 calc R . . 
C21 C -0.2766(4) 0.9890(8) 0.4774(2) 0.0404(19) Uani 1 1 d . . . 
H21A H -0.2399 0.9695 0.4966 0.048 Uiso 1 1 calc R . . 
C22 C -0.1737(4) 0.6474(6) 0.32957(19) 0.0265(16) Uani 1 1 d . . . 
C23 C -0.2079(4) 0.5402(7) 0.31552(19) 0.0301(17) Uani 1 1 d . . . 
H23A H -0.2563 0.5203 0.3243 0.036 Uiso 1 1 calc R . . 
C24 C -0.1721(4) 0.4665(7) 0.2898(2) 0.0308(17) Uani 1 1 d . . . 
H24A H -0.1966 0.3973 0.2808 0.037 Uiso 1 1 calc R . . 
C25 C -0.0992(4) 0.4912(7) 0.2763(2) 0.0327(17) Uani 1 1 d . . . 
C26 C -0.0607(5) 0.4156(8) 0.2484(2) 0.042(2) Uani 1 1 d . . . 
H26A H -0.0849 0.3471 0.2387 0.050 Uiso 1 1 calc R . . 
C27 C 0.0107(5) 0.4411(9) 0.2356(3) 0.051(2) Uani 1 1 d . . . 
H27A H 0.0343 0.3917 0.2169 0.061 Uiso 1 1 calc R . . 
C28 C 0.0484(5) 0.5422(8) 0.2510(2) 0.049(2) Uani 1 1 d . . . 
H28A H 0.0976 0.5588 0.2429 0.058 Uiso 1 1 calc R . . 
C29 C 0.0130(4) 0.6171(7) 0.2779(2) 0.0359(18) Uani 1 1 d . . . 
H29A H 0.0391 0.6833 0.2880 0.043 Uiso 1 1 calc R . . 
C30 C -0.0626(4) 0.5960(7) 0.29065(19) 0.0281(16) Uani 1 1 d . . . 
C31 C -0.1008(4) 0.6742(7) 0.31825(18) 0.0253(14) Uani 1 1 d . . . 
C32 C -0.0594(4) 0.7840(7) 0.3328(2) 0.0287(16) Uani 1 1 d . . . 
C33 C -0.0358(4) 0.7982(7) 0.3716(2) 0.0296(16) Uani 1 1 d . . . 
C34 C 0.0018(4) 0.9047(7) 0.3832(2) 0.0334(17) Uani 1 1 d . . . 
H34A H 0.0182 0.9129 0.4097 0.040 Uiso 1 1 calc R . . 
C35 C 0.0150(4) 0.9956(8) 0.3568(2) 0.0387(18) Uani 1 1 d . . . 
H35A H 0.0406 1.0641 0.3654 0.046 Uiso 1 1 calc R . . 
C36 C -0.0102(4) 0.9868(7) 0.3159(2) 0.0344(18) Uani 1 1 d . . . 
C37 C 0.0013(5) 1.0797(8) 0.2875(2) 0.045(2) Uani 1 1 d . . . 
H37A H 0.0260 1.1498 0.2955 0.054 Uiso 1 1 calc R . . 
C38 C -0.0238(5) 1.0678(9) 0.2481(2) 0.049(2) Uani 1 1 d . . . 
H38A H -0.0160 1.1296 0.2297 0.058 Uiso 1 1 calc R . . 
C39 C -0.0612(4) 0.9619(8) 0.2360(2) 0.0389(19) Uani 1 1 d . . . 
H39A H -0.0777 0.9538 0.2095 0.047 Uiso 1 1 calc R . . 
C40 C -0.0733(4) 0.8710(7) 0.2629(2) 0.0332(17) Uani 1 1 d . . . 
H40A H -0.0994 0.8028 0.2544 0.040 Uiso 1 1 calc R . . 
C41 C -0.0469(4) 0.8781(7) 0.3034(2) 0.0326(17) Uani 1 1 d . . . 
C42 C -0.2121(4) 0.8907(7) 0.3514(2) 0.0300(17) Uani 1 1 d . . . 
C43 C -0.2216(4) 0.9172(8) 0.3106(2) 0.0387(19) Uani 1 1 d . . . 
H43A H -0.2300 0.8559 0.2921 0.046 Uiso 1 1 calc R . . 
C44 C -0.2182(5) 1.0374(9) 0.2979(3) 0.055(3) Uani 1 1 d . . . 
H44A H -0.2257 1.0559 0.2708 0.067 Uiso 1 1 calc R . . 
C45 C -0.2042(5) 1.1264(8) 0.3246(3) 0.054(2) Uani 1 1 d . . . 
H45A H -0.2017 1.2055 0.3156 0.064 Uiso 1 1 calc R . . 
C46 C -0.1938(5) 1.1034(8) 0.3635(3) 0.043(2) Uani 1 1 d . . . 
H46A H -0.1845 1.1658 0.3815 0.052 Uiso 1 1 calc R . . 
C47 C -0.1970(4) 0.9853(7) 0.3771(2) 0.0333(18) Uani 1 1 d . . . 
H47A H -0.1886 0.9697 0.4043 0.040 Uiso 1 1 calc R . . 
C48 C -0.3251(4) 0.7118(7) 0.3574(2) 0.0349(19) Uani 1 1 d . . . 
C49 C -0.3714(4) 0.7926(8) 0.3380(2) 0.045(2) Uani 1 1 d . . . 
H49A H -0.3507 0.8629 0.3276 0.053 Uiso 1 1 calc R . . 
C50 C -0.4491(5) 0.7718(10) 0.3335(3) 0.062(3) Uani 1 1 d . . . 
H50A H -0.4791 0.8281 0.3202 0.075 Uiso 1 1 calc R . . 
C51 C -0.4802(5) 0.6726(12) 0.3481(3) 0.067(3) Uani 1 1 d . . . 
H51A H -0.5322 0.6611 0.3457 0.080 Uiso 1 1 calc R . . 
C52 C -0.4353(4) 0.5840(10) 0.3674(3) 0.056(3) Uani 1 1 d . . . 
H52A H -0.4564 0.5123 0.3764 0.067 Uiso 1 1 calc R . . 
C53 C -0.3581(4) 0.6075(9) 0.3724(2) 0.043(2) Uani 1 1 d . . . 
H53A H -0.3280 0.5520 0.3861 0.051 Uiso 1 1 calc R . . 
C54 C -0.0100(4) 0.5516(7) 0.3861(2) 0.0299(17) Uani 1 1 d . . . 
C55 C 0.0660(4) 0.5653(8) 0.3742(2) 0.0386(18) Uani 1 1 d . . . 
H55A H 0.0907 0.6386 0.3774 0.046 Uiso 1 1 calc R . . 
C56 C 0.1032(4) 0.4676(8) 0.3575(2) 0.043(2) Uani 1 1 d . . . 
H56A H 0.1539 0.4748 0.3504 0.051 Uiso 1 1 calc R . . 
C57 C 0.0665(4) 0.3609(8) 0.3513(2) 0.042(2) Uani 1 1 d . . . 
H57A H 0.0922 0.2961 0.3401 0.050 Uiso 1 1 calc R . . 
C58 C -0.0078(4) 0.3492(8) 0.3614(2) 0.0387(19) Uani 1 1 d . . . 
H58A H -0.0330 0.2775 0.3561 0.046 Uiso 1 1 calc R . . 
C59 C -0.0462(4) 0.4438(7) 0.3797(2) 0.0313(17) Uani 1 1 d . . . 
H59A H -0.0963 0.4340 0.3876 0.038 Uiso 1 1 calc R . . 
C60 C 0.0032(4) 0.7079(6) 0.4534(2) 0.0286(16) Uani 1 1 d . . . 
C61 C -0.0053(4) 0.8142(8) 0.4765(2) 0.0352(18) Uani 1 1 d . . . 
H61A H -0.0377 0.8748 0.4676 0.042 Uiso 1 1 calc R . . 
C62 C 0.0348(4) 0.8284(8) 0.5128(2) 0.0388(19) Uani 1 1 d . . . 
H62A H 0.0297 0.8993 0.5274 0.047 Uiso 1 1 calc R . . 
C63 C 0.0818(4) 0.7382(8) 0.5270(2) 0.041(2) Uani 1 1 d . . . 
H63A H 0.1073 0.7480 0.5514 0.049 Uiso 1 1 calc R . . 
C64 C 0.0908(4) 0.6353(8) 0.5055(2) 0.042(2) Uani 1 1 d . . . 
H64A H 0.1223 0.5748 0.5152 0.050 Uiso 1 1 calc R . . 
C65 C 0.0522(4) 0.6197(7) 0.4679(2) 0.0302(17) Uani 1 1 d . . . 
H65A H 0.0598 0.5499 0.4530 0.036 Uiso 1 1 calc R . . 
C66 C 0.0516(4) -1.4608(8) 1.0987(2) 0.043(2) Uani 1 1 d . . . 
H66A H 0.0062 -1.4543 1.0828 0.065 Uiso 1 1 calc R . . 
H66B H 0.0662 -1.3826 1.1082 0.065 Uiso 1 1 calc R . . 
H66C H 0.0426 -1.5128 1.1213 0.065 Uiso 1 1 calc R . . 
C67 C 0.1142(4) -1.5127(8) 1.0731(2) 0.0352(18) Uani 1 1 d . . . 
H67A H 0.0982 -1.5912 1.0627 0.042 Uiso 1 1 calc R . . 
C68 C 0.1886(4) -1.5284(8) 1.0971(2) 0.0352(18) Uani 1 1 d . . . 
H68A H 0.1988 -1.4482 1.1082 0.042 Uiso 1 1 calc R . . 
C69 C 0.1815(4) -1.6084(9) 1.1342(2) 0.044(2) Uani 1 1 d . . . 
C70 C 0.1366(5) -1.7099(9) 1.1353(3) 0.054(2) Uani 1 1 d . . . 
H70A H 0.1068 -1.7291 1.1130 0.064 Uiso 1 1 calc R . . 
C71 C 0.1347(7) -1.7837(11) 1.1689(4) 0.083(4) Uani 1 1 d . . . 
H71A H 0.1049 -1.8527 1.1685 0.100 Uiso 1 1 calc R . . 
C72 C 0.1763(7) -1.7564(16) 1.2031(4) 0.105(6) Uani 1 1 d . . . 
H72A H 0.1751 -1.8062 1.2256 0.126 Uiso 1 1 calc R . . 
C73 C 0.2201(7) -1.6531(17) 1.2030(3) 0.102(5) Uani 1 1 d . . . 
H73A H 0.2473 -1.6311 1.2259 0.122 Uiso 1 1 calc R . . 
C74 C 0.2231(5) -1.5829(12) 1.1687(3) 0.069(3) Uani 1 1 d . . . 
H74A H 0.2543 -1.5156 1.1687 0.083 Uiso 1 1 calc R . . 
C75 C 0.3454(4) -1.4876(10) 1.0938(2) 0.043(2) Uani 1 1 d . . . 
C76 C 0.3861(4) -1.5538(10) 1.1226(2) 0.049(2) Uani 1 1 d . . . 
H76A H 0.3785 -1.6363 1.1250 0.059 Uiso 1 1 calc R . . 
C77 C 0.4382(5) -1.4956(12) 1.1475(2) 0.059(3) Uani 1 1 d . . . 
H77A H 0.4651 -1.5391 1.1668 0.071 Uiso 1 1 calc R . . 
C78 C 0.4501(5) -1.3717(12) 1.1437(3) 0.063(3) Uani 1 1 d . . . 
H78A H 0.4856 -1.3330 1.1599 0.076 Uiso 1 1 calc R . . 
C79 C 0.4094(5) -1.3084(11) 1.1161(2) 0.055(3) Uani 1 1 d . . . 
H79A H 0.4168 -1.2259 1.1136 0.066 Uiso 1 1 calc R . . 
C80 C 0.3573(4) -1.3654(9) 1.0916(2) 0.042(2) Uani 1 1 d . . . 
H80A H 0.3294 -1.3201 1.0732 0.051 Uiso 1 1 calc R . . 
C81 C 0.2959(4) -1.7164(7) 1.0628(2) 0.0305(17) Uani 1 1 d . . . 
C82 C 0.3712(4) -1.7515(8) 1.0568(2) 0.0378(19) Uani 1 1 d . . . 
H82A H 0.4094 -1.6944 1.0546 0.045 Uiso 1 1 calc R . . 
C83 C 0.3871(4) -1.8732(9) 1.0542(2) 0.043(2) Uani 1 1 d . . . 
H83A H 0.4372 -1.8969 1.0510 0.052 Uiso 1 1 calc R . . 
C84 C 0.3325(4) -1.9600(9) 1.0561(2) 0.048(2) Uani 1 1 d . . . 
H84A H 0.3451 -2.0410 1.0540 0.058 Uiso 1 1 calc R . . 
C85 C 0.2584(5) -1.9252(8) 1.0610(2) 0.044(2) Uani 1 1 d . . . 
H85A H 0.2204 -1.9830 1.0622 0.053 Uiso 1 1 calc R . . 
C86 C 0.2405(4) -1.8052(8) 1.0642(2) 0.0349(18) Uani 1 1 d . . . 
H86A H 0.1901 -1.7829 1.0673 0.042 Uiso 1 1 calc R . . 
C87 C 0.1641(4) -1.5795(7) 0.8998(2) 0.0314(17) Uani 1 1 d . . . 
C88 C 0.1158(4) -1.6782(7) 0.8918(2) 0.0369(18) Uani 1 1 d . . . 
H88A H 0.0745 -1.6906 0.9085 0.044 Uiso 1 1 calc R . . 
C89 C 0.1271(4) -1.7556(7) 0.8607(2) 0.0384(19) Uani 1 1 d . . . 
H89A H 0.0935 -1.8189 0.8564 0.046 Uiso 1 1 calc R . . 
C90 C 0.1889(5) -1.7409(8) 0.8350(2) 0.041(2) Uani 1 1 d . . . 
C91 C 0.2032(5) -1.8225(8) 0.8027(2) 0.0412(18) Uani 1 1 d . . . 
H91A H 0.1703 -1.8864 0.7980 0.049 Uiso 1 1 calc R . . 
C92 C 0.2642(5) -1.8076(8) 0.7788(2) 0.048(2) Uani 1 1 d . . . 
H92A H 0.2737 -1.8627 0.7583 0.058 Uiso 1 1 calc R . . 
C93 C 0.3140(5) -1.7080(8) 0.7847(2) 0.046(2) Uani 1 1 d . . . 
H93A H 0.3550 -1.6977 0.7676 0.055 Uiso 1 1 calc R . . 
C94 C 0.3022(4) -1.6270(7) 0.8154(2) 0.0375(19) Uani 1 1 d . . . 
H94A H 0.3356 -1.5634 0.8192 0.045 Uiso 1 1 calc R . . 
C95 C 0.2385(4) -1.6404(7) 0.8414(2) 0.0330(17) Uani 1 1 d . . . 
C96 C 0.2260(4) -1.5610(7) 0.8750(2) 0.0287(16) Uani 1 1 d . . . 
C97 C 0.2803(3) -1.4591(6) 0.88234(19) 0.0238(15) Uani 1 1 d . . . 
C98 C 0.3284(4) -1.4579(6) 0.9153(2) 0.0280(16) Uani 1 1 d . . . 
C99 C 0.3807(4) -1.3605(7) 0.9196(2) 0.0306(17) Uani 1 1 d . . . 
H99A H 0.4121 -1.3577 0.9422 0.037 Uiso 1 1 calc R . . 
C100 C 0.3860(4) -1.2719(7) 0.8915(2) 0.0347(17) Uani 1 1 d . . . 
H10A H 0.4221 -1.2117 0.8947 0.042 Uiso 1 1 calc R . . 
C101 C 0.3382(4) -1.2701(7) 0.8583(2) 0.0294(16) Uani 1 1 d . . . 
C102 C 0.3410(4) -1.1750(8) 0.8291(2) 0.0396(19) Uani 1 1 d . . . 
H10B H 0.3759 -1.1132 0.8325 0.048 Uiso 1 1 calc R . . 
C103 C 0.2933(4) -1.1735(8) 0.7966(2) 0.0402(19) Uani 1 1 d . . . 
H10C H 0.2968 -1.1119 0.7777 0.048 Uiso 1 1 calc R . . 
C104 C 0.2390(4) -1.2644(8) 0.7915(2) 0.0381(18) Uani 1 1 d . . . 
H10D H 0.2055 -1.2616 0.7698 0.046 Uiso 1 1 calc R . . 
C105 C 0.2352(4) -1.3585(7) 0.8189(2) 0.0318(17) Uani 1 1 d . . . 
H10E H 0.1998 -1.4193 0.8149 0.038 Uiso 1 1 calc R . . 
C106 C 0.2847(4) -1.3638(7) 0.8530(2) 0.0297(16) Uani 1 1 d . . . 
C107 C 0.0485(4) -1.5072(8) 0.9587(2) 0.0337(18) Uani 1 1 d . . . 
C108 C 0.0315(4) -1.6182(8) 0.9778(2) 0.0369(18) Uani 1 1 d . . . 
H10F H 0.0680 -1.6784 0.9791 0.044 Uiso 1 1 calc R . . 
C109 C -0.0388(4) -1.6369(8) 0.9942(2) 0.042(2) Uani 1 1 d . . . 
H10G H -0.0506 -1.7118 1.0049 0.050 Uiso 1 1 calc R . . 
C110 C -0.0916(4) -1.5466(9) 0.9950(2) 0.043(2) Uani 1 1 d . . . 
H11B H -0.1384 -1.5599 1.0069 0.052 Uiso 1 1 calc R . . 
C111 C -0.0757(4) -1.4375(8) 0.9783(2) 0.041(2) Uani 1 1 d . . . 
H11C H -0.1109 -1.3754 0.9794 0.050 Uiso 1 1 calc R . . 
C112 C -0.0065(4) -1.4199(7) 0.9597(2) 0.0320(17) Uani 1 1 d . . . 
H11D H 0.0030 -1.3462 0.9474 0.038 Uiso 1 1 calc R . . 
C113 C 0.1290(4) -1.3396(7) 0.9109(2) 0.0301(17) Uani 1 1 d . . . 
C114 C 0.0791(4) -1.3492(7) 0.8786(2) 0.0359(18) Uani 1 1 d . . . 
H11E H 0.0554 -1.4223 0.8734 0.043 Uiso 1 1 calc R . . 
C115 C 0.0641(4) -1.2500(7) 0.8540(2) 0.0355(18) Uani 1 1 d . . . 
H11F H 0.0303 -1.2567 0.8325 0.043 Uiso 1 1 calc R . . 
C116 C 0.1008(4) -1.1394(7) 0.8619(2) 0.0359(18) Uani 1 1 d . . . 
H11G H 0.0920 -1.0727 0.8456 0.043 Uiso 1 1 calc R . . 
C117 C 0.1504(4) -1.1327(8) 0.8947(2) 0.042(2) Uani 1 1 d . . . 
H11H H 0.1746 -1.0605 0.9008 0.051 Uiso 1 1 calc R . . 
C118 C 0.1636(4) -1.2329(7) 0.9182(2) 0.0356(18) Uani 1 1 d . . . 
H11I H 0.1974 -1.2271 0.9398 0.043 Uiso 1 1 calc R . . 
C119 C 0.4163(4) -1.5637(7) 0.9807(2) 0.0276(16) Uani 1 1 d . . . 
C120 C 0.4688(4) -1.6519(7) 0.9710(2) 0.0288(16) Uani 1 1 d . . . 
H12B H 0.4579 -1.7073 0.9507 0.035 Uiso 1 1 calc R . . 
C121 C 0.5367(4) -1.6578(7) 0.9911(2) 0.0345(18) Uani 1 1 d . . . 
H12C H 0.5717 -1.7169 0.9846 0.041 Uiso 1 1 calc R . . 
C122 C 0.5529(4) -1.5744(8) 1.0215(2) 0.041(2) Uani 1 1 d . . . 
H12D H 0.5989 -1.5786 1.0353 0.050 Uiso 1 1 calc R . . 
C123 C 0.5018(4) -1.4864(8) 1.0314(2) 0.0354(17) Uani 1 1 d . . . 
H12E H 0.5130 -1.4313 1.0516 0.042 Uiso 1 1 calc R . . 
C124 C 0.4335(4) -1.4804(7) 1.01089(19) 0.0290(15) Uani 1 1 d . . . 
H12F H 0.3989 -1.4204 1.0173 0.035 Uiso 1 1 calc R . . 
C125 C 0.3142(4) -1.7096(7) 0.9376(2) 0.0280(16) Uani 1 1 d . . . 
C126 C 0.2785(4) -1.8004(7) 0.9584(2) 0.0321(17) Uani 1 1 d . . . 
H12G H 0.2534 -1.7826 0.9823 0.039 Uiso 1 1 calc R . . 
C127 C 0.2794(4) -1.9183(7) 0.9443(2) 0.0363(18) Uani 1 1 d . . . 
H12H H 0.2558 -1.9786 0.9591 0.044 Uiso 1 1 calc R . . 
C128 C 0.3152(4) -1.9464(7) 0.9084(2) 0.0387(19) Uani 1 1 d . . . 
H12I H 0.3138 -2.0247 0.8985 0.046 Uiso 1 1 calc R . . 
C129 C 0.3532(4) -1.8570(7) 0.8871(2) 0.0329(17) Uani 1 1 d . . . 
H12J H 0.3781 -1.8752 0.8632 0.039 Uiso 1 1 calc R . . 
C130 C 0.3535(4) -1.7413(8) 0.9020(2) 0.0324(18) Uani 1 1 d . . . 
H13B H 0.3803 -1.6822 0.8883 0.039 Uiso 1 1 calc R . . 
C131 C 0.2164(6) 0.7758(13) 1.1565(4) 0.087(4) Uani 1 1 d . . . 
H13K H 0.2656 0.7460 1.1574 0.105 Uiso 1 1 calc R . . 
C132 C 0.1898(7) 0.8256(11) 1.1218(4) 0.087(4) Uani 1 1 d . . . 
H13J H 0.2194 0.8286 1.0988 0.104 Uiso 1 1 calc R . . 
C133 C 0.1185(6) 0.8708(10) 1.1221(3) 0.069(3) Uani 1 1 d . . . 
H13I H 0.0988 0.9056 1.0988 0.083 Uiso 1 1 calc R . . 
C134 C 0.0757(5) 0.8663(9) 1.1555(3) 0.057(3) Uani 1 1 d . . . 
H13H H 0.0270 0.8981 1.1553 0.068 Uiso 1 1 calc R . . 
C135 C 0.1037(6) 0.8160(11) 1.1888(3) 0.074(3) Uiso 1 1 d . . . 
H13G H 0.0742 0.8138 1.2119 0.089 Uiso 1 1 calc R . . 
C136 C 0.1727(7) 0.7687(12) 1.1898(4) 0.087(4) Uiso 1 1 d . . . 
H13F H 0.1907 0.7313 1.2131 0.105 Uiso 1 1 calc R . . 
C137 C -0.2073(8) -0.4859(15) 0.7111(4) 0.112(5) Uiso 1 1 d . . . 
H13E H -0.1627 -0.5267 0.7172 0.135 Uiso 1 1 calc R . . 
C138 C -0.2650(10) -0.4933(19) 0.7366(5) 0.139(6) Uiso 1 1 d . . . 
H13C H -0.2619 -0.5389 0.7601 0.167 Uiso 1 1 calc R . . 
C139 C -0.3280(12) -0.432(2) 0.7267(6) 0.170(8) Uiso 1 1 d . . . 
H13D H -0.3709 -0.4411 0.7425 0.203 Uiso 1 1 calc R . . 
C140 C -0.3313(11) -0.3514(19) 0.6926(5) 0.149(7) Uiso 1 1 d . . . 
H14D H -0.3746 -0.3069 0.6869 0.179 Uiso 1 1 calc R . . 
C141 C -0.2703(9) -0.3432(19) 0.6693(5) 0.134(6) Uiso 1 1 d . . . 
H14E H -0.2674 -0.2868 0.6487 0.161 Uiso 1 1 calc R . . 
C142 C -0.2112(10) -0.4222(18) 0.6773(5) 0.136(6) Uiso 1 1 d . . . 
H14B H -0.1731 -0.4309 0.6582 0.164 Uiso 1 1 calc R . . 
C143 C -0.2285(10) 0.3182(17) 0.6079(5) 0.133(6) Uiso 1 1 d . . . 
H14J H -0.1888 0.3022 0.6257 0.160 Uiso 1 1 calc R . . 
C144 C -0.3037(9) 0.3334(17) 0.6238(5) 0.131(6) Uiso 1 1 d . . . 
H14C H -0.3162 0.3121 0.6500 0.158 Uiso 1 1 calc R . . 
C145 C -0.3561(9) 0.3821(16) 0.5969(5) 0.127(6) Uiso 1 1 d . . . 
H14I H -0.4012 0.4140 0.6065 0.153 Uiso 1 1 calc R . . 
C146 C -0.3424(9) 0.3833(16) 0.5586(5) 0.114(5) Uiso 1 1 d . . . 
H14H H -0.3814 0.4020 0.5406 0.137 Uiso 1 1 calc R . . 
C147 C -0.2754(9) 0.3588(16) 0.5445(5) 0.119(5) Uiso 1 1 d . . . 
H14G H -0.2678 0.3632 0.5168 0.143 Uiso 1 1 calc R . . 
C148 C -0.2143(9) 0.3262(14) 0.5692(5) 0.119(6) Uani 1 1 d . . . 
H14F H -0.1664 0.3112 0.5588 0.143 Uiso 1 1 calc R . . 
C149 C -0.5004(8) -0.446(3) 0.8259(7) 0.163(15) Uiso 0.50 1 d PG . . 
C150 C -0.4744(12) -0.561(2) 0.8167(6) 0.109(9) Uiso 0.50 1 d PG . . 
C151 C -0.3973(13) -0.5852(17) 0.8177(6) 0.133(12) Uiso 0.50 1 d PG . . 
C152 C -0.3461(8) -0.495(2) 0.8278(6) 0.125(10) Uiso 0.50 1 d PG . . 
C153 C -0.3720(12) -0.3801(19) 0.8369(6) 0.096(8) Uiso 0.50 1 d PG . . 
C184 C -0.4492(14) -0.3555(18) 0.8359(7) 0.21(2) Uiso 0.50 1 d PG . . 
C155 C -0.3549(15) -0.0222(18) 0.7228(7) 0.115(10) Uiso 0.50 1 d PG . . 
C156 C -0.4164(11) 0.038(3) 0.7393(7) 0.154(14) Uiso 0.50 1 d PG . . 
C157 C -0.4137(12) 0.162(3) 0.7448(6) 0.138(12) Uiso 0.50 1 d PG . . 
C158 C -0.3494(17) 0.2256(18) 0.7338(7) 0.139(12) Uiso 0.50 1 d PG . . 
C159 C -0.2878(12) 0.166(3) 0.7174(7) 0.176(16) Uiso 0.50 1 d PG . . 
C160 C -0.2906(11) 0.042(3) 0.7119(6) 0.131(11) Uiso 0.50 1 d PG . . 
C166 C -0.5316(12) -0.318(3) 0.7390(6) 0.121(10) Uiso 0.50 1 d PG . . 
C164 C -0.5753(14) -0.3631(19) 0.7073(8) 0.119(10) Uiso 0.50 1 d PG . . 
C165 C -0.6114(12) -0.284(3) 0.6810(6) 0.146(13) Uiso 0.50 1 d PG . . 
C163 C -0.6039(14) -0.161(2) 0.6863(7) 0.142(12) Uiso 0.50 1 d PG . . 
C162 C -0.5602(17) -0.1161(19) 0.7180(9) 0.157(14) Uiso 0.50 1 d PG . . 
C161 C -0.5241(14) -0.195(3) 0.7443(7) 0.35(4) Uiso 0.50 1 d PG . . 
 
loop_ 
 _atom_site_aniso_label 
 _atom_site_aniso_U_11 
 _atom_site_aniso_U_22 
 _atom_site_aniso_U_33 
 _atom_site_aniso_U_23 
 _atom_site_aniso_U_13 
 _atom_site_aniso_U_12 
Ru1 0.0278(3) 0.0246(3) 0.0256(3) 0.0000(3) -0.0021(2) 0.0002(3) 
Ru2 0.0261(3) 0.0249(3) 0.0297(3) -0.0023(3) -0.0047(2) 0.0017(3) 
Cl1 0.0353(9) 0.0269(10) 0.0465(11) 0.0013(9) 0.0024(8) -0.0022(8) 
Cl2 0.0360(10) 0.0260(10) 0.0446(10) -0.0071(8) -0.0083(8) -0.0032(8) 
P1 0.0277(9) 0.0271(11) 0.0297(9) -0.0001(8) 0.0013(7) -0.0003(8) 
P2 0.0269(9) 0.0239(10) 0.0274(9) 0.0008(8) -0.0032(7) -0.0008(8) 
P3 0.0296(9) 0.0210(9) 0.0291(8) -0.0032(9) -0.0034(7) 0.0004(9) 
P4 0.0281(9) 0.0314(12) 0.0280(9) -0.0024(8) -0.0041(7) 0.0009(9) 
P5 0.0279(9) 0.0247(11) 0.0319(9) -0.0010(8) -0.0067(7) 0.0004(9) 
P6 0.0284(9) 0.0209(10) 0.0275(9) -0.0016(8) -0.0043(7) 0.0011(8) 
N1 0.029(3) 0.034(4) 0.023(3) -0.005(3) -0.003(2) -0.007(3) 
N2 0.025(3) 0.032(4) 0.039(3) -0.008(3) -0.008(3) 0.007(3) 
C1 0.046(4) 0.063(7) 0.029(4) 0.006(4) 0.000(3) 0.009(5) 
C2 0.040(4) 0.035(5) 0.029(4) 0.003(3) -0.001(3) 0.005(4) 
C3 0.028(4) 0.043(5) 0.023(3) 0.001(3) 0.008(3) 0.000(3) 
C4 0.036(4) 0.051(6) 0.029(4) -0.002(4) 0.002(3) 0.016(4) 
C5 0.040(5) 0.101(9) 0.028(4) 0.005(5) 0.008(3) 0.009(5) 
C6 0.041(5) 0.101(10) 0.055(6) 0.005(6) -0.001(4) 0.011(6) 
C7 0.055(7) 0.121(12) 0.067(7) -0.028(7) -0.010(5) 0.053(7) 
C8 0.082(8) 0.092(9) 0.069(7) -0.053(7) -0.026(6) 0.044(7) 
C9 0.066(6) 0.060(7) 0.031(4) -0.017(4) -0.002(4) 0.012(5) 
C10 0.032(4) 0.035(5) 0.032(4) 0.008(4) -0.002(3) -0.001(4) 
C11 0.039(4) 0.035(5) 0.040(4) 0.002(4) 0.003(3) 0.003(4) 
C12 0.026(4) 0.061(7) 0.060(5) 0.005(5) 0.004(4) 0.010(4) 
C13 0.038(4) 0.043(6) 0.052(5) 0.006(4) 0.003(4) -0.009(4) 
C14 0.045(5) 0.028(5) 0.050(5) -0.002(4) 0.006(4) -0.007(4) 
C15 0.036(4) 0.044(6) 0.040(4) 0.007(4) 0.000(3) 0.000(4) 
C16 0.036(4) 0.035(5) 0.035(4) 0.007(3) 0.008(3) 0.009(4) 
C17 0.039(4) 0.040(5) 0.046(5) 0.003(4) 0.001(4) 0.001(4) 
C18 0.053(5) 0.044(6) 0.054(5) 0.007(4) 0.003(4) 0.013(5) 
C19 0.059(6) 0.028(5) 0.089(7) 0.006(5) 0.033(5) 0.006(5) 
C20 0.040(5) 0.049(6) 0.076(6) -0.007(5) 0.000(5) -0.008(5) 
C21 0.039(4) 0.033(5) 0.049(5) -0.007(4) -0.002(4) -0.004(4) 
C22 0.034(4) 0.024(4) 0.021(3) 0.001(3) -0.006(3) 0.001(3) 
C23 0.033(4) 0.031(5) 0.026(3) 0.006(3) -0.001(3) 0.000(3) 
C24 0.041(4) 0.023(4) 0.028(4) 0.002(3) -0.009(3) -0.002(3) 
C25 0.047(4) 0.025(4) 0.026(3) -0.005(3) -0.007(3) 0.004(4) 
C26 0.052(5) 0.034(5) 0.038(4) -0.007(4) -0.011(4) -0.002(4) 
C27 0.059(6) 0.048(6) 0.047(5) -0.021(4) 0.004(4) 0.007(5) 
C28 0.046(5) 0.053(7) 0.047(5) -0.014(4) 0.013(4) 0.003(4) 
C29 0.037(4) 0.019(4) 0.051(5) -0.007(4) -0.002(4) -0.002(3) 
C30 0.039(4) 0.025(4) 0.020(3) 0.006(3) -0.007(3) 0.005(3) 
C31 0.034(4) 0.016(3) 0.026(3) -0.003(3) -0.004(3) 0.001(3) 
C32 0.029(4) 0.022(4) 0.035(4) 0.001(3) 0.000(3) -0.001(3) 
C33 0.028(4) 0.025(4) 0.036(4) -0.005(3) 0.004(3) 0.001(3) 
C34 0.043(4) 0.032(5) 0.026(3) -0.001(3) 0.000(3) -0.005(4) 
C35 0.045(4) 0.024(5) 0.047(4) -0.004(4) -0.002(3) -0.001(4) 
C36 0.040(4) 0.028(5) 0.035(4) -0.004(3) -0.001(3) -0.001(3) 
C37 0.073(6) 0.025(5) 0.037(4) 0.000(4) 0.004(4) -0.010(4) 
C38 0.060(6) 0.039(5) 0.047(5) 0.017(4) 0.006(4) -0.001(5) 
C39 0.044(4) 0.043(5) 0.029(4) -0.004(4) 0.001(3) 0.004(4) 
C40 0.035(4) 0.033(5) 0.032(4) -0.007(3) 0.000(3) 0.007(4) 
C41 0.034(4) 0.026(4) 0.037(4) 0.001(3) 0.003(3) -0.002(3) 
C42 0.031(4) 0.031(4) 0.028(4) -0.001(3) 0.001(3) 0.006(3) 
C43 0.038(4) 0.039(5) 0.039(4) 0.004(4) -0.001(3) 0.000(4) 
C44 0.068(6) 0.051(7) 0.048(5) 0.025(5) 0.017(4) 0.018(5) 
C45 0.088(7) 0.020(5) 0.052(5) 0.008(4) 0.012(5) 0.011(5) 
C46 0.053(5) 0.021(4) 0.056(5) -0.001(4) 0.012(4) -0.007(4) 
C47 0.038(4) 0.026(5) 0.036(4) 0.003(3) -0.004(3) 0.003(3) 
C48 0.031(4) 0.041(5) 0.033(4) -0.002(3) -0.003(3) -0.002(3) 
C49 0.034(4) 0.048(6) 0.051(5) 0.003(4) -0.002(4) -0.003(4) 
C50 0.045(5) 0.069(8) 0.073(6) 0.001(6) -0.023(5) -0.006(5) 
C51 0.042(5) 0.089(9) 0.070(6) 0.011(7) -0.015(4) -0.024(6) 
C52 0.037(5) 0.076(7) 0.056(5) 0.012(5) -0.008(4) -0.028(5) 
C53 0.038(4) 0.056(6) 0.035(4) 0.003(4) -0.003(3) -0.008(4) 
C54 0.030(4) 0.030(4) 0.030(4) -0.002(3) -0.003(3) 0.000(3) 
C55 0.034(4) 0.031(5) 0.051(4) -0.003(4) 0.003(4) 0.001(4) 
C56 0.036(4) 0.046(6) 0.047(5) -0.010(4) -0.003(4) 0.000(4) 
C57 0.050(5) 0.040(5) 0.036(4) -0.010(4) -0.007(4) 0.010(4) 
C58 0.044(5) 0.025(4) 0.047(5) -0.007(4) -0.005(4) 0.002(4) 
C59 0.038(4) 0.025(4) 0.031(4) -0.008(3) -0.002(3) -0.001(3) 
C60 0.027(3) 0.020(4) 0.039(4) 0.004(3) -0.004(3) -0.004(3) 
C61 0.031(4) 0.037(5) 0.038(4) -0.008(4) -0.005(3) 0.005(4) 
C62 0.044(4) 0.033(5) 0.040(4) -0.010(4) -0.007(3) 0.004(4) 
C63 0.037(4) 0.048(5) 0.037(4) 0.004(4) -0.008(3) 0.001(4) 
C64 0.034(4) 0.036(5) 0.054(5) -0.005(4) -0.017(4) -0.003(4) 
C65 0.025(4) 0.031(4) 0.034(4) -0.005(3) 0.001(3) -0.004(3) 
C66 0.032(4) 0.051(6) 0.047(4) -0.008(4) 0.003(3) -0.001(4) 
C67 0.029(4) 0.037(5) 0.040(4) -0.006(4) 0.005(3) -0.002(3) 
C68 0.035(4) 0.040(5) 0.031(4) 0.000(3) -0.004(3) 0.003(4) 
C69 0.041(4) 0.055(6) 0.035(4) 0.008(4) 0.004(4) 0.017(4) 
C70 0.060(6) 0.053(7) 0.048(5) 0.002(5) 0.018(4) 0.005(5) 
C71 0.082(8) 0.074(9) 0.094(8) 0.033(7) 0.055(7) 0.026(7) 
C72 0.062(7) 0.160(16) 0.094(10) 0.080(10) 0.027(7) 0.033(9) 
C73 0.066(7) 0.196(18) 0.044(6) 0.032(8) -0.005(5) 0.020(10) 
C74 0.062(6) 0.094(9) 0.052(6) 0.006(6) -0.006(5) 0.000(6) 
C75 0.027(4) 0.065(6) 0.036(4) -0.013(5) -0.010(3) 0.005(5) 
C76 0.038(4) 0.068(7) 0.042(4) -0.004(5) -0.007(4) 0.001(5) 
C77 0.054(5) 0.085(9) 0.040(4) -0.012(6) -0.019(4) 0.012(6) 
C78 0.033(5) 0.103(10) 0.053(5) -0.039(6) -0.015(4) -0.004(5) 
C79 0.047(5) 0.071(7) 0.047(5) -0.024(5) 0.003(4) -0.015(5) 
C80 0.043(4) 0.053(6) 0.032(4) -0.019(4) -0.001(3) -0.006(4) 
C81 0.028(4) 0.034(5) 0.030(4) 0.002(3) -0.006(3) 0.005(3) 
C82 0.036(4) 0.037(5) 0.041(4) 0.010(4) -0.007(3) -0.001(4) 
C83 0.032(4) 0.048(6) 0.050(5) 0.013(4) -0.004(4) 0.007(4) 
C84 0.043(5) 0.041(6) 0.061(5) 0.014(4) 0.002(4) 0.006(4) 
C85 0.036(4) 0.041(5) 0.056(5) 0.017(4) 0.003(4) -0.011(4) 
C86 0.027(4) 0.041(5) 0.036(4) -0.001(4) 0.003(3) 0.003(4) 
C87 0.027(4) 0.025(4) 0.042(4) 0.002(3) -0.012(3) -0.003(3) 
C88 0.032(4) 0.026(4) 0.053(5) -0.004(4) 0.000(3) 0.000(3) 
C89 0.041(4) 0.029(5) 0.045(4) -0.006(4) -0.014(4) -0.002(4) 
C90 0.052(5) 0.034(5) 0.037(4) -0.005(4) -0.016(4) 0.010(4) 
C91 0.056(5) 0.031(4) 0.036(4) -0.004(4) -0.016(4) 0.004(4) 
C92 0.077(6) 0.032(5) 0.036(4) -0.016(4) -0.020(4) 0.012(5) 
C93 0.073(6) 0.038(5) 0.026(4) -0.008(4) 0.002(4) 0.014(5) 
C94 0.052(5) 0.029(5) 0.031(4) -0.008(3) -0.007(3) 0.005(4) 
C95 0.039(4) 0.033(5) 0.027(3) -0.002(3) -0.011(3) 0.004(4) 
C96 0.033(4) 0.019(4) 0.033(4) 0.000(3) -0.006(3) 0.004(3) 
C97 0.022(3) 0.022(4) 0.028(3) -0.003(3) 0.001(3) 0.007(3) 
C98 0.031(4) 0.022(4) 0.031(3) -0.002(3) -0.003(3) 0.004(3) 
C99 0.035(4) 0.030(4) 0.027(3) 0.002(3) -0.004(3) 0.004(3) 
C100 0.034(4) 0.028(4) 0.042(4) 0.000(4) -0.007(3) -0.006(3) 
C101 0.039(4) 0.022(4) 0.027(3) -0.003(3) 0.002(3) 0.001(3) 
C102 0.046(4) 0.029(5) 0.044(4) 0.004(4) 0.007(4) 0.002(4) 
C103 0.056(5) 0.034(5) 0.031(4) 0.006(3) 0.010(4) -0.004(4) 
C104 0.044(4) 0.035(5) 0.035(4) 0.001(4) 0.000(3) 0.010(4) 
C105 0.038(4) 0.027(4) 0.031(4) 0.005(3) -0.002(3) 0.004(3) 
C106 0.033(4) 0.026(4) 0.030(4) -0.008(3) -0.004(3) 0.005(3) 
C107 0.025(3) 0.038(5) 0.038(4) 0.001(4) -0.017(3) -0.004(4) 
C108 0.035(4) 0.032(5) 0.044(4) 0.002(4) -0.007(3) 0.000(4) 
C109 0.035(4) 0.040(5) 0.051(5) 0.016(4) 0.002(4) -0.016(4) 
C110 0.031(4) 0.048(6) 0.051(5) 0.008(4) -0.004(4) 0.002(4) 
C111 0.034(4) 0.040(5) 0.049(5) -0.001(4) -0.012(4) 0.006(4) 
C112 0.035(4) 0.023(4) 0.037(4) 0.002(3) -0.008(3) -0.003(3) 
C113 0.028(4) 0.026(5) 0.036(4) -0.002(3) -0.005(3) 0.002(3) 
C114 0.034(4) 0.030(5) 0.044(4) -0.004(3) -0.006(3) 0.001(3) 
C115 0.038(4) 0.039(5) 0.030(4) 0.001(3) -0.007(3) 0.006(4) 
C116 0.039(4) 0.023(4) 0.045(4) 0.003(4) 0.001(3) 0.001(4) 
C117 0.044(5) 0.031(5) 0.051(5) 0.006(4) 0.000(4) -0.008(4) 
C118 0.036(4) 0.029(5) 0.041(4) -0.001(4) -0.009(3) -0.003(4) 
C119 0.027(3) 0.025(4) 0.031(4) -0.003(3) 0.005(3) -0.003(3) 
C120 0.026(3) 0.023(4) 0.037(4) 0.001(3) -0.002(3) 0.000(3) 
C121 0.030(4) 0.023(4) 0.050(5) 0.006(4) -0.005(3) 0.005(3) 
C122 0.035(4) 0.040(5) 0.050(5) 0.013(4) -0.012(4) -0.001(4) 
C123 0.035(4) 0.030(4) 0.041(4) -0.003(4) -0.006(3) -0.014(4) 
C124 0.027(3) 0.025(4) 0.035(3) 0.000(3) -0.003(3) -0.004(3) 
C125 0.025(3) 0.022(4) 0.037(4) -0.003(3) -0.006(3) 0.006(3) 
C126 0.034(4) 0.028(5) 0.034(4) 0.001(3) -0.006(3) 0.002(3) 
C127 0.032(4) 0.023(4) 0.054(5) 0.004(4) -0.008(4) -0.006(3) 
C128 0.043(4) 0.023(4) 0.050(5) -0.012(4) -0.012(4) 0.007(4) 
C129 0.036(4) 0.032(5) 0.030(4) -0.007(3) -0.003(3) 0.000(3) 
C130 0.026(4) 0.044(5) 0.027(4) 0.003(3) -0.006(3) 0.001(4) 
C131 0.055(6) 0.099(11) 0.109(9) 0.030(8) 0.033(6) 0.022(7) 
C132 0.094(9) 0.063(8) 0.104(9) 0.023(7) 0.055(8) 0.007(7) 
C133 0.084(7) 0.060(7) 0.064(6) 0.025(6) 0.006(6) 0.001(6) 
C134 0.040(5) 0.056(7) 0.074(6) 0.008(5) 0.006(5) 0.005(5) 
C148 0.116(11) 0.078(10) 0.164(15) -0.035(10) 0.079(11) 0.005(9) 
 
_geom_special_details 
; 
 All esds (except the esd in the dihedral angle between two l.s. planes) 
 are estimated using the full covariance matrix.  The cell esds are taken 
 into account individually in the estimation of esds in distances, angles 
 and torsion angles; correlations between esds in cell parameters are only 
 used when they are defined by crystal symmetry.  An approximate (isotropic) 
 treatment of cell esds is used for estimating esds involving l.s. planes. 
; 
 
loop_ 
 _geom_bond_atom_site_label_1 
 _geom_bond_atom_site_label_2 
 _geom_bond_distance 
 _geom_bond_site_symmetry_2 
 _geom_bond_publ_flag 
Ru1 N1 2.179(5) . ? 
Ru1 P2 2.2605(18) . ? 
Ru1 P3 2.3214(18) . ? 
Ru1 P1 2.333(2) . ? 
Ru1 Cl1 2.576(2) . ? 
Ru2 N2 2.193(6) . ? 
Ru2 P6 2.262(2) . ? 
Ru2 P5 2.3305(18) . ? 
Ru2 P4 2.3456(19) . ? 
Ru2 Cl2 2.563(2) . ? 
P1 C10 1.826(7) . ? 
P1 C16 1.839(8) . ? 
P1 C3 1.899(6) . ? 
P2 C42 1.826(8) . ? 
P2 C48 1.856(7) . ? 
P2 C22 1.872(7) . ? 
P3 C54 1.846(8) . ? 
P3 C60 1.856(7) . ? 
P3 C33 1.865(8) . ? 
P4 C81 1.828(8) . ? 
P4 C75 1.856(8) . ? 
P4 C68 1.897(7) . ? 
P5 C87 1.848(8) . ? 
P5 C113 1.855(8) . ? 
P5 C107 1.859(7) . ? 
P6 C125 1.827(8) . ? 
P6 C98 1.848(7) . ? 
P6 C119 1.863(7) . ? 
N1 C2 1.481(9) . ? 
N2 C67 1.491(9) . ? 
C1 C2 1.540(9) . ? 
C2 C3 1.535(9) . ? 
C3 C4 1.516(10) . ? 
C4 C9 1.362(12) . ? 
C4 C5 1.391(12) . ? 
C5 C6 1.374(13) . ? 
C6 C7 1.375(16) . ? 
C7 C8 1.391(17) . ? 
C8 C9 1.401(12) . ? 
C10 C11 1.382(10) . ? 
C10 C15 1.424(12) . ? 
C11 C12 1.403(11) . ? 
C12 C13 1.383(13) . ? 
C13 C14 1.360(11) . ? 
C14 C15 1.389(11) . ? 
C16 C21 1.387(11) . ? 
C16 C17 1.418(10) . ? 
C17 C18 1.385(12) . ? 
C18 C19 1.409(13) . ? 
C19 C20 1.373(13) . ? 
C20 C21 1.382(13) . ? 
C22 C31 1.376(10) . ? 
C22 C23 1.414(10) . ? 
C23 C24 1.343(10) . ? 
C24 C25 1.394(10) . ? 
C25 C30 1.413(10) . ? 
C25 C26 1.425(11) . ? 
C26 C27 1.364(12) . ? 
C27 C28 1.399(12) . ? 
C28 C29 1.374(11) . ? 
C29 C30 1.424(10) . ? 
C30 C31 1.434(10) . ? 
C31 C32 1.500(10) . ? 
C32 C33 1.362(10) . ? 
C32 C41 1.445(10) . ? 
C33 C34 1.409(10) . ? 
C34 C35 1.358(11) . ? 
C35 C36 1.427(10) . ? 
C36 C37 1.411(11) . ? 
C36 C41 1.431(10) . ? 
C37 C38 1.383(11) . ? 
C38 C39 1.406(12) . ? 
C39 C40 1.364(11) . ? 
C40 C41 1.423(10) . ? 
C42 C47 1.378(10) . ? 
C42 C43 1.392(10) . ? 
C43 C44 1.402(12) . ? 
C44 C45 1.350(13) . ? 
C45 C46 1.324(11) . ? 
C46 C47 1.388(11) . ? 
C48 C49 1.371(11) . ? 
C48 C53 1.390(11) . ? 
C49 C50 1.398(11) . ? 
C50 C51 1.325(15) . ? 
C51 C52 1.415(14) . ? 
C52 C53 1.397(10) . ? 
C54 C59 1.374(10) . ? 
C54 C55 1.411(10) . ? 
C55 C56 1.386(11) . ? 
C56 C57 1.367(12) . ? 
C57 C58 1.362(11) . ? 
C58 C59 1.392(10) . ? 
C60 C65 1.391(10) . ? 
C60 C61 1.416(10) . ? 
C61 C62 1.400(9) . ? 
C62 C63 1.383(11) . ? 
C63 C64 1.358(11) . ? 
C64 C65 1.427(10) . ? 
C66 C67 1.512(10) . ? 
C67 C68 1.541(9) . ? 
C68 C69 1.523(11) . ? 
C69 C74 1.383(12) . ? 
C69 C70 1.381(13) . ? 
C70 C71 1.383(14) . ? 
C71 C72 1.381(18) . ? 
C72 C73 1.38(2) . ? 
C73 C74 1.381(16) . ? 
C75 C80 1.376(14) . ? 
C75 C76 1.401(12) . ? 
C76 C77 1.392(12) . ? 
C77 C78 1.398(16) . ? 
C78 C79 1.357(14) . ? 
C79 C80 1.376(11) . ? 
C81 C86 1.391(11) . ? 
C81 C82 1.402(10) . ? 
C82 C83 1.384(12) . ? 
C83 C84 1.366(12) . ? 
C84 C85 1.375(11) . ? 
C85 C86 1.375(12) . ? 
C87 C96 1.388(10) . ? 
C87 C88 1.413(10) . ? 
C88 C89 1.359(11) . ? 
C89 C90 1.396(11) . ? 
C90 C91 1.429(11) . ? 
C90 C95 1.435(11) . ? 
C91 C92 1.351(11) . ? 
C92 C93 1.427(12) . ? 
C93 C94 1.374(10) . ? 
C94 C95 1.431(11) . ? 
C95 C96 1.438(10) . ? 
C96 C97 1.503(10) . ? 
C97 C98 1.380(9) . ? 
C97 C106 1.440(10) . ? 
C98 C99 1.430(10) . ? 
C99 C100 1.358(10) . ? 
C100 C101 1.385(10) . ? 
C101 C106 1.416(10) . ? 
C101 C102 1.433(10) . ? 
C102 C103 1.365(11) . ? 
C103 C104 1.402(11) . ? 
C104 C105 1.386(10) . ? 
C105 C106 1.427(9) . ? 
C107 C112 1.374(10) . ? 
C107 C108 1.419(11) . ? 
C108 C109 1.374(10) . ? 
C109 C110 1.371(12) . ? 
C110 C111 1.362(12) . ? 
C111 C112 1.387(11) . ? 
C113 C118 1.356(11) . ? 
C113 C114 1.385(9) . ? 
C114 C115 1.397(10) . ? 
C115 C116 1.413(11) . ? 
C116 C117 1.396(11) . ? 
C117 C118 1.377(11) . ? 
C119 C120 1.389(10) . ? 
C119 C124 1.397(10) . ? 
C120 C121 1.369(9) . ? 
C121 C122 1.398(11) . ? 
C122 C123 1.372(11) . ? 
C123 C124 1.382(9) . ? 
C125 C126 1.377(10) . ? 
C125 C130 1.419(10) . ? 
C126 C127 1.391(11) . ? 
C127 C128 1.388(11) . ? 
C128 C129 1.393(11) . ? 
C129 C130 1.377(11) . ? 
C131 C132 1.355(16) . ? 
C131 C136 1.354(15) . ? 
C132 C133 1.357(15) . ? 
C133 C134 1.345(13) . ? 
C134 C135 1.329(13) . ? 
C135 C136 1.327(15) . ? 
C137 C138 1.330(19) . ? 
C137 C142 1.33(2) . ? 
C138 C139 1.35(2) . ? 
C139 C140 1.44(2) . ? 
C140 C141 1.33(2) . ? 
C141 C142 1.39(2) . ? 
C143 C148 1.312(19) . ? 
C143 C144 1.44(2) . ? 
C144 C145 1.39(2) . ? 
C145 C146 1.296(18) . ? 
C146 C147 1.305(19) . ? 
C147 C148 1.40(2) . ? 
C149 C150 1.3900 . ? 
C149 C184 1.3900 . ? 
C150 C151 1.3900 . ? 
C151 C152 1.3900 . ? 
C152 C153 1.3900 . ? 
C153 C184 1.3900 . ? 
C155 C156 1.3900 . ? 
C155 C160 1.3900 . ? 
C156 C157 1.3900 . ? 
C157 C158 1.3900 . ? 
C158 C159 1.3900 . ? 
C159 C160 1.3900 . ? 
C166 C164 1.3900 . ? 
C166 C161 1.3900 . ? 
C164 C165 1.3900 . ? 
C165 C163 1.3900 . ? 
C163 C162 1.3900 . ? 
C162 C161 1.3900 . ? 
 
loop_ 
 _geom_angle_atom_site_label_1 
 _geom_angle_atom_site_label_2 
 _geom_angle_atom_site_label_3 
 _geom_angle 
 _geom_angle_site_symmetry_1 
 _geom_angle_site_symmetry_3 
 _geom_angle_publ_flag 
N1 Ru1 P2 177.84(17) . . ? 
N1 Ru1 P3 91.55(15) . . ? 
P2 Ru1 P3 89.88(7) . . ? 
N1 Ru1 P1 80.29(16) . . ? 
P2 Ru1 P1 97.84(7) . . ? 
P3 Ru1 P1 159.93(7) . . ? 
N1 Ru1 Cl1 81.58(17) . . ? 
P2 Ru1 Cl1 99.76(7) . . ? 
P3 Ru1 Cl1 100.08(7) . . ? 
P1 Ru1 Cl1 96.84(7) . . ? 
N2 Ru2 P6 177.74(19) . . ? 
N2 Ru2 P5 91.52(15) . . ? 
P6 Ru2 P5 89.00(7) . . ? 
N2 Ru2 P4 79.88(15) . . ? 
P6 Ru2 P4 98.94(7) . . ? 
P5 Ru2 P4 160.10(7) . . ? 
N2 Ru2 Cl2 82.12(18) . . ? 
P6 Ru2 Cl2 99.97(7) . . ? 
P5 Ru2 Cl2 99.55(7) . . ? 
P4 Ru2 Cl2 97.01(7) . . ? 
C10 P1 C16 102.1(4) . . ? 
C10 P1 C3 97.3(3) . . ? 
C16 P1 C3 109.6(3) . . ? 
C10 P1 Ru1 129.2(3) . . ? 
C16 P1 Ru1 113.4(2) . . ? 
C3 P1 Ru1 103.2(2) . . ? 
C42 P2 C48 100.2(3) . . ? 
C42 P2 C22 102.3(3) . . ? 
C48 P2 C22 103.4(3) . . ? 
C42 P2 Ru1 121.2(2) . . ? 
C48 P2 Ru1 116.5(2) . . ? 
C22 P2 Ru1 110.8(2) . . ? 
C54 P3 C60 100.0(3) . . ? 
C54 P3 C33 98.9(3) . . ? 
C60 P3 C33 105.8(3) . . ? 
C54 P3 Ru1 126.2(2) . . ? 
C60 P3 Ru1 108.2(2) . . ? 
C33 P3 Ru1 115.4(2) . . ? 
C81 P4 C75 102.6(4) . . ? 
C81 P4 C68 109.6(4) . . ? 
C75 P4 C68 96.9(3) . . ? 
C81 P4 Ru2 114.0(2) . . ? 
C75 P4 Ru2 128.4(3) . . ? 
C68 P4 Ru2 103.2(2) . . ? 
C87 P5 C113 96.5(3) . . ? 
C87 P5 C107 105.3(3) . . ? 
C113 P5 C107 99.5(3) . . ? 
C87 P5 Ru2 118.1(2) . . ? 
C113 P5 Ru2 127.5(2) . . ? 
C107 P5 Ru2 106.9(2) . . ? 
C125 P6 C98 104.4(3) . . ? 
C125 P6 C119 99.1(3) . . ? 
C98 P6 C119 103.0(3) . . ? 
C125 P6 Ru2 120.5(2) . . ? 
C98 P6 Ru2 109.4(2) . . ? 
C119 P6 Ru2 118.2(2) . . ? 
C2 N1 Ru1 116.4(4) . . ? 
C67 N2 Ru2 116.1(4) . . ? 
N1 C2 C3 106.9(6) . . ? 
N1 C2 C1 111.6(6) . . ? 
C3 C2 C1 112.6(6) . . ? 
C4 C3 C2 116.2(6) . . ? 
C4 C3 P1 117.3(5) . . ? 
C2 C3 P1 109.7(4) . . ? 
C9 C4 C5 119.4(8) . . ? 
C9 C4 C3 122.7(7) . . ? 
C5 C4 C3 117.7(8) . . ? 
C6 C5 C4 121.3(10) . . ? 
C7 C6 C5 118.7(10) . . ? 
C6 C7 C8 121.5(10) . . ? 
C7 C8 C9 118.3(11) . . ? 
C4 C9 C8 120.7(10) . . ? 
C11 C10 C15 117.1(7) . . ? 
C11 C10 P1 125.4(7) . . ? 
C15 C10 P1 117.3(6) . . ? 
C10 C11 C12 122.1(8) . . ? 
C13 C12 C11 119.6(8) . . ? 
C14 C13 C12 119.2(8) . . ? 
C13 C14 C15 122.3(8) . . ? 
C14 C15 C10 119.6(7) . . ? 
C21 C16 C17 118.4(8) . . ? 
C21 C16 P1 121.4(6) . . ? 
C17 C16 P1 119.3(6) . . ? 
C18 C17 C16 119.8(8) . . ? 
C17 C18 C19 119.4(8) . . ? 
C20 C19 C18 121.4(9) . . ? 
C21 C20 C19 118.5(9) . . ? 
C20 C21 C16 122.5(8) . . ? 
C31 C22 C23 119.5(7) . . ? 
C31 C22 P2 121.5(5) . . ? 
C23 C22 P2 118.3(5) . . ? 
C24 C23 C22 121.4(7) . . ? 
C23 C24 C25 121.6(7) . . ? 
C24 C25 C30 118.4(7) . . ? 
C24 C25 C26 122.6(7) . . ? 
C30 C25 C26 119.0(7) . . ? 
C27 C26 C25 121.7(8) . . ? 
C26 C27 C28 119.6(8) . . ? 
C29 C28 C27 120.3(8) . . ? 
C28 C29 C30 121.7(7) . . ? 
C25 C30 C29 117.6(7) . . ? 
C25 C30 C31 119.9(6) . . ? 
C29 C30 C31 122.4(7) . . ? 
C22 C31 C30 119.2(7) . . ? 
C22 C31 C32 122.9(6) . . ? 
C30 C31 C32 117.9(6) . . ? 
C33 C32 C41 120.3(7) . . ? 
C33 C32 C31 122.9(7) . . ? 
C41 C32 C31 116.7(6) . . ? 
C32 C33 C34 119.7(7) . . ? 
C32 C33 P3 118.9(6) . . ? 
C34 C33 P3 121.2(5) . . ? 
C35 C34 C33 122.2(7) . . ? 
C34 C35 C36 120.5(7) . . ? 
C37 C36 C35 122.5(7) . . ? 
C37 C36 C41 119.5(7) . . ? 
C35 C36 C41 118.0(7) . . ? 
C38 C37 C36 120.8(8) . . ? 
C37 C38 C39 119.7(8) . . ? 
C40 C39 C38 120.6(7) . . ? 
C39 C40 C41 121.6(7) . . ? 
C40 C41 C36 117.7(7) . . ? 
C40 C41 C32 123.0(7) . . ? 
C36 C41 C32 119.2(6) . . ? 
C47 C42 C43 117.3(7) . . ? 
C47 C42 P2 122.5(5) . . ? 
C43 C42 P2 120.1(6) . . ? 
C42 C43 C44 119.3(8) . . ? 
C45 C44 C43 120.5(8) . . ? 
C46 C45 C44 121.4(8) . . ? 
C45 C46 C47 119.5(8) . . ? 
C42 C47 C46 121.9(7) . . ? 
C49 C48 C53 117.6(7) . . ? 
C49 C48 P2 125.2(6) . . ? 
C53 C48 P2 117.0(6) . . ? 
C48 C49 C50 121.6(9) . . ? 
C51 C50 C49 120.5(10) . . ? 
C50 C51 C52 120.7(8) . . ? 
C53 C52 C51 117.9(9) . . ? 
C48 C53 C52 121.6(8) . . ? 
C59 C54 C55 119.6(7) . . ? 
C59 C54 P3 121.1(5) . . ? 
C55 C54 P3 119.4(6) . . ? 
C56 C55 C54 118.8(8) . . ? 
C57 C56 C55 120.9(7) . . ? 
C58 C57 C56 120.1(8) . . ? 
C57 C58 C59 120.6(8) . . ? 
C54 C59 C58 119.9(7) . . ? 
C65 C60 C61 118.0(6) . . ? 
C65 C60 P3 121.5(5) . . ? 
C61 C60 P3 120.0(5) . . ? 
C62 C61 C60 120.2(7) . . ? 
C63 C62 C61 120.8(8) . . ? 
C64 C63 C62 120.1(7) . . ? 
C63 C64 C65 120.3(7) . . ? 
C60 C65 C64 120.6(7) . . ? 
N2 C67 C66 111.1(7) . . ? 
N2 C67 C68 106.4(6) . . ? 
C66 C67 C68 112.3(6) . . ? 
C69 C68 C67 114.1(6) . . ? 
C69 C68 P4 117.9(5) . . ? 
C67 C68 P4 110.7(5) . . ? 
C74 C69 C70 116.5(9) . . ? 
C74 C69 C68 120.1(9) . . ? 
C70 C69 C68 123.3(7) . . ? 
C71 C70 C69 121.6(10) . . ? 
C70 C71 C72 120.9(12) . . ? 
C71 C72 C73 118.4(11) . . ? 
C74 C73 C72 119.6(12) . . ? 
C73 C74 C69 122.8(12) . . ? 
C80 C75 C76 118.4(8) . . ? 
C80 C75 P4 119.2(6) . . ? 
C76 C75 P4 122.2(8) . . ? 
C77 C76 C75 119.7(10) . . ? 
C76 C77 C78 120.2(9) . . ? 
C79 C78 C77 119.5(8) . . ? 
C78 C79 C80 120.5(11) . . ? 
C75 C80 C79 121.7(9) . . ? 
C86 C81 C82 118.4(7) . . ? 
C86 C81 P4 121.2(5) . . ? 
C82 C81 P4 119.8(6) . . ? 
C83 C82 C81 118.3(8) . . ? 
C84 C83 C82 122.9(8) . . ? 
C83 C84 C85 118.7(9) . . ? 
C84 C85 C86 120.1(8) . . ? 
C85 C86 C81 121.6(7) . . ? 
C96 C87 C88 118.8(7) . . ? 
C96 C87 P5 119.4(5) . . ? 
C88 C87 P5 121.8(6) . . ? 
C89 C88 C87 122.9(7) . . ? 
C88 C89 C90 120.4(8) . . ? 
C89 C90 C91 121.7(8) . . ? 
C89 C90 C95 118.7(7) . . ? 
C91 C90 C95 119.6(8) . . ? 
C92 C91 C90 120.5(8) . . ? 
C91 C92 C93 120.5(8) . . ? 
C94 C93 C92 120.9(8) . . ? 
C93 C94 C95 120.1(8) . . ? 
C94 C95 C90 118.3(7) . . ? 
C94 C95 C96 121.9(7) . . ? 
C90 C95 C96 119.7(7) . . ? 
C87 C96 C95 119.4(7) . . ? 
C87 C96 C97 121.4(6) . . ? 
C95 C96 C97 119.2(6) . . ? 
C98 C97 C106 119.5(6) . . ? 
C98 C97 C96 121.6(6) . . ? 
C106 C97 C96 118.8(6) . . ? 
C97 C98 C99 118.7(6) . . ? 
C97 C98 P6 123.9(5) . . ? 
C99 C98 P6 116.4(5) . . ? 
C100 C99 C98 121.9(6) . . ? 
C99 C100 C101 120.7(7) . . ? 
C100 C101 C106 119.4(7) . . ? 
C100 C101 C102 121.6(7) . . ? 
C106 C101 C102 119.0(6) . . ? 
C103 C102 C101 121.2(8) . . ? 
C102 C103 C104 120.3(7) . . ? 
C105 C104 C103 120.0(7) . . ? 
C104 C105 C106 121.3(7) . . ? 
C101 C106 C105 118.2(7) . . ? 
C101 C106 C97 119.8(6) . . ? 
C105 C106 C97 122.0(7) . . ? 
C112 C107 C108 116.9(7) . . ? 
C112 C107 P5 122.3(6) . . ? 
C108 C107 P5 119.9(6) . . ? 
C109 C108 C107 120.1(8) . . ? 
C110 C109 C108 120.9(8) . . ? 
C111 C110 C109 120.1(8) . . ? 
C110 C111 C112 119.3(8) . . ? 
C107 C112 C111 122.4(8) . . ? 
C118 C113 C114 119.3(7) . . ? 
C118 C113 P5 122.4(5) . . ? 
C114 C113 P5 118.3(6) . . ? 
C113 C114 C115 120.6(7) . . ? 
C114 C115 C116 119.4(6) . . ? 
C117 C116 C115 118.5(7) . . ? 
C118 C117 C116 120.0(8) . . ? 
C113 C118 C117 122.1(7) . . ? 
C120 C119 C124 119.3(6) . . ? 
C120 C119 P6 123.6(5) . . ? 
C124 C119 P6 116.8(5) . . ? 
C121 C120 C119 120.4(7) . . ? 
C120 C121 C122 119.7(7) . . ? 
C123 C122 C121 120.7(7) . . ? 
C122 C123 C124 119.5(7) . . ? 
C123 C124 C119 120.4(7) . . ? 
C126 C125 C130 117.6(7) . . ? 
C126 C125 P6 119.6(5) . . ? 
C130 C125 P6 122.4(6) . . ? 
C125 C126 C127 121.0(7) . . ? 
C128 C127 C126 120.5(7) . . ? 
C127 C128 C129 119.8(7) . . ? 
C130 C129 C128 119.1(7) . . ? 
C129 C130 C125 121.9(7) . . ? 
C132 C131 C136 121.2(11) . . ? 
C133 C132 C131 117.6(10) . . ? 
C134 C133 C132 121.2(10) . . ? 
C135 C134 C133 119.4(9) . . ? 
C136 C135 C134 121.6(11) . . ? 
C135 C136 C131 119.0(12) . . ? 
C138 C137 C142 122.2(18) . . ? 
C137 C138 C139 117(2) . . ? 
C138 C139 C140 122(2) . . ? 
C141 C140 C139 118(2) . . ? 
C140 C141 C142 117(2) . . ? 
C137 C142 C141 122.2(18) . . ? 
C148 C143 C144 122.1(17) . . ? 
C145 C144 C143 115.1(17) . . ? 
C146 C145 C144 120.3(18) . . ? 
C145 C146 C147 121.6(17) . . ? 
C146 C147 C148 122.9(16) . . ? 
C143 C148 C147 116.1(15) . . ? 
C150 C149 C184 120.0 . . ? 
C149 C150 C151 120.0 . . ? 
C150 C151 C152 120.0 . . ? 
C153 C152 C151 120.0 . . ? 
C152 C153 C184 120.0 . . ? 
C153 C184 C149 120.0 . . ? 
C156 C155 C160 120.0 . . ? 
C155 C156 C157 120.0 . . ? 
C158 C157 C156 120.0 . . ? 
C159 C158 C157 120.0 . . ? 
C158 C159 C160 120.0 . . ? 
C159 C160 C155 120.0 . . ? 
C164 C166 C161 120.0 . . ? 
C165 C164 C166 120.0 . . ? 
C163 C165 C164 120.0 . . ? 
C162 C163 C165 120.0 . . ? 
C163 C162 C161 120.0 . . ? 
C162 C161 C166 120.0 . . ? 
 
_diffrn_measured_fraction_theta_max    0.989 
_diffrn_reflns_theta_full              27.48 
_diffrn_measured_fraction_theta_full   0.989 
_refine_diff_density_max    1.010 
_refine_diff_density_min   -0.640 
_refine_diff_density_rms    0.108 

#===end
